# Supplementary material for: Non-reciprocal transmission of microwave acoustic waves in nonlinear parity–time symmetric resonators
Source: Springer Nature journal article supplement (doi:10.1038/s41928-020-0414-z), 2020-05-18
Supplement: MOESM3 [file 41928_2020_414_MOESM3_ESM.xlsx]

## Sheet: Figure 2c
Figure 2c			Below threshold	self-oscillation
		Frequency	intensity	intensity
		Hz	dBm	dBm
		196000000	-118.932	-118.397
		196003000	-118.322	-118.96
		196005000	-117.665	-119.35
		196008000	-117.935	-117.742
		196010000	-117.648	-117.814
		196013000	-117.118	-119.165
		196015000	-116.76	-118.409
		196018000	-117.356	-119.558
		196020000	-117.681	-118.014
		196023000	-117.372	-118.345
		196025000	-117.162	-117.932
		196028000	-117.418	-118.964
		196030000	-117.052	-118.609
		196033000	-117.843	-118.692
		196035000	-117.176	-118.948
		196038000	-117.362	-118.091
		196040000	-117.463	-117.98
		196043000	-117.442	-117.975
		196045000	-117.869	-118.559
		196048000	-117.581	-119.084
		196050000	-117.844	-118.559
		196053000	-117.26	-118.951
		196055000	-117.042	-119.241
		196058000	-117.652	-119.075
		196060000	-117.651	-118.205
		196063000	-116.645	-119.352
		196065000	-116.772	-118.004
		196068000	-117.18	-118.977
		196070000	-117.463	-119.669
		196073000	-116.519	-119.081
		196075000	-116.91	-119.076
		196078000	-117.668	-118.489
		196080000	-116.937	-118.918
		196083000	-116.372	-118.996
		196085000	-116.713	-119.81
		196088000	-116.139	-119.095
		196090000	-117.17	-118.806
		196093000	-117.203	-118.814
		196095000	-116.698	-119.105
		196098000	-117.648	-118.76
		196100000	-117.03	-119.4
		196103000	-116.647	-118.932
		196105000	-116.251	-118.233
		196108000	-117.18	-118.323
		196110000	-115.784	-119.012
		196113000	-116.772	-118.529
		196115000	-117.494	-118.479
		196118000	-116.628	-118.841
		196120000	-117.237	-118.339
		196123000	-116.512	-118.897
		196125000	-116.47	-119.022
		196128000	-116.633	-119.301
		196130000	-116.897	-119.01
		196133000	-116.977	-119.647
		196135000	-116.984	-119.075
		196138000	-116.626	-119.353
		196140000	-117.267	-119.118
		196143000	-117.047	-118.748
		196145000	-116.575	-118.991
		196148000	-116.303	-119.995
		196150000	-117.444	-118.552
		196153000	-117.629	-118.771
		196155000	-115.933	-118.767
		196158000	-117.227	-118.67
		196160000	-117.034	-118.823
		196163000	-117.052	-118.855
		196165000	-116.218	-119.48
		196168000	-116.51	-119.581
		196170000	-116.727	-119.128
		196173000	-117.196	-118.463
		196175000	-117.306	-118.574
		196178000	-117.192	-119.147
		196180000	-117.18	-118.776
		196183000	-117.032	-118.91
		196185000	-117.137	-118.92
		196188000	-117.507	-117.906
		196190000	-118.083	-119.244
		196193000	-117.034	-118.904
		196195000	-117.491	-118.198
		196198000	-116.637	-118.956
		196200000	-117.884	-119.23
		196203000	-117.049	-118.358
		196205000	-117.674	-119.059
		196208000	-117.052	-119.248
		196210000	-117.247	-119.356
		196213000	-117.188	-118.953
		196215000	-118.022	-119.232
		196218000	-116.961	-118.459
		196220000	-116.612	-118.433
		196223000	-116.963	-119.258
		196225000	-116.439	-118.588
		196228000	-117.753	-118.529
		196230000	-116.379	-118.185
		196233000	-116.331	-119.177
		196235000	-116.589	-119.311
		196238000	-116.319	-118.508
		196240000	-117.195	-118.749
		196243000	-116.722	-118.977
		196245000	-116.584	-119.055
		196248000	-116.848	-118.41
		196250000	-116.601	-118.662
		196253000	-116.965	-118.929
		196255000	-117.788	-118.728
		196258000	-117.162	-118.489
		196260000	-116.861	-118.104
		196263000	-116.784	-119.12
		196265000	-117.137	-118.87
		196268000	-117.151	-118.69
		196270000	-116.499	-119.067
		196273000	-117.341	-118.197
		196275000	-117.618	-119.229
		196278000	-115.937	-118.835
		196280000	-116.464	-119.029
		196283000	-115.858	-118.534
		196285000	-116.923	-118.064
		196288000	-115.383	-119.177
		196290000	-115.484	-118.883
		196293000	-116.774	-118.808
		196295000	-116.292	-119.031
		196298000	-116.419	-118.19
		196300000	-115.802	-119.259
		196303000	-116.195	-119.172
		196305000	-116.19	-118.726
		196308000	-115.593	-117.892
		196310000	-116.628	-118.577
		196313000	-115.749	-119.494
		196315000	-115.512	-119.101
		196318000	-115.653	-119.445
		196320000	-115.676	-118.707
		196323000	-115.24	-118.586
		196325000	-116.001	-118.942
		196328000	-115.008	-118.236
		196330000	-114.299	-118.769
		196333000	-115.424	-119.03
		196335000	-115.254	-119.163
		196338000	-115.732	-118.91
		196340000	-115.63	-119.204
		196343000	-114.322	-119.007
		196345000	-114.349	-118.709
		196348000	-115.575	-119.025
		196350000	-114.311	-118.563
		196353000	-115.3	-119.217
		196355000	-115.761	-118.872
		196358000	-114.606	-118.495
		196360000	-114.922	-118.932
		196363000	-115.138	-118.449
		196365000	-113.254	-119.626
		196368000	-114.645	-119.246
		196370000	-114.695	-118.445
		196373000	-113.675	-118.7
		196375000	-115.46	-119.531
		196378000	-115.199	-119.256
		196380000	-114.811	-118.851
		196383000	-114.144	-118.845
		196385000	-114.356	-118.587
		196388000	-114.017	-118.102
		196390000	-114.705	-118.65
		196393000	-114.748	-118.897
		196395000	-114.911	-118.148
		196398000	-114.07	-118.659
		196400000	-114.376	-119.241
		196403000	-113.6	-118.734
		196405000	-113.959	-118.91
		196408000	-114.093	-118.555
		196410000	-114.09	-118.921
		196413000	-114.622	-118.705
		196415000	-114.704	-118.873
		196418000	-113.894	-117.638
		196420000	-115.017	-118.768
		196423000	-113.762	-119.135
		196425000	-114.755	-117.964
		196428000	-114.193	-118.572
		196430000	-115.057	-119.216
		196433000	-113.721	-119.251
		196435000	-114.426	-118.976
		196438000	-114.049	-118.516
		196440000	-113.657	-118.222
		196443000	-114.637	-119.475
		196445000	-115.016	-118.774
		196448000	-113.447	-118.868
		196450000	-114.295	-118.255
		196453000	-113.928	-119.202
		196455000	-114.557	-117.775
		196458000	-115.529	-118.311
		196460000	-112.802	-118.095
		196463000	-113.688	-118.639
		196465000	-113.776	-118.849
		196468000	-114.145	-118.702
		196470000	-113.885	-119.289
		196473000	-113.375	-118.86
		196475000	-113.736	-118.483
		196478000	-113.533	-118.401
		196480000	-113.987	-118.513
		196483000	-113.56	-119.443
		196485000	-113.454	-118.405
		196488000	-113.523	-118.237
		196490000	-113.347	-119.014
		196493000	-113.573	-118.177
		196495000	-112.649	-118.875
		196498000	-114.036	-118.487
		196500000	-113.454	-118.594
		196503000	-112.587	-118.646
		196505000	-113.001	-118.935
		196508000	-112.958	-119.308
		196510000	-112.379	-118.677
		196513000	-113.471	-119.178
		196515000	-112.805	-118.557
		196518000	-112.306	-118.925
		196520000	-112.694	-118.433
		196523000	-111.677	-118.047
		196525000	-112.084	-118.301
		196528000	-111.282	-118.566
		196530000	-112.115	-119.138
		196533000	-110.866	-119.27
		196535000	-111.766	-119.566
		196538000	-111.503	-118.245
		196540000	-110.571	-118.991
		196543000	-110.404	-118.484
		196545000	-110.754	-118.288
		196548000	-110.44	-119.303
		196550000	-109.625	-118.402
		196553000	-110.221	-118.817
		196555000	-109.754	-118.974
		196558000	-109.684	-118.442
		196560000	-108.127	-119.174
		196563000	-107.95	-118.732
		196565000	-108.563	-118.161
		196568000	-108.223	-118.898
		196570000	-108.315	-117.691
		196573000	-108.504	-119.365
		196575000	-108.072	-119.045
		196578000	-107.531	-118.608
		196580000	-107.635	-118.275
		196583000	-107.159	-119.093
		196585000	-107.316	-118.298
		196588000	-106.556	-118.769
		196590000	-106.419	-118.871
		196593000	-106.302	-118.078
		196595000	-106.42	-118.773
		196598000	-105.758	-118.571
		196600000	-105.79	-118.71
		196603000	-105.388	-117.793
		196605000	-106.206	-118.151
		196608000	-105.33	-118.919
		196610000	-105.748	-117.757
		196613000	-104.779	-118.137
		196615000	-105.171	-117.999
		196618000	-103.796	-117.86
		196620000	-103.455	-116.957
		196623000	-104.536	-115.768
		196625000	-104.424	-117.004
		196628000	-102.769	-117.618
		196630000	-103.219	-117.961
		196633000	-102.314	-117.337
		196635000	-103.552	-117.05
		196638000	-103.231	-117.736
		196640000	-102.796	-117.294
		196643000	-103.393	-117.186
		196645000	-102.615	-117.459
		196648000	-102.948	-117.289
		196650000	-101.768	-117.264
		196653000	-102.862	-117.653
		196655000	-102.655	-116.875
		196658000	-102.783	-115.722
		196660000	-102.465	-115.286
		196663000	-102.245	-112.701
		196665000	-102.809	-105.827
		196668000	-103.807	-56.9329
		196670000	-103.675	-105.425
		196673000	-103.003	-112.513
		196675000	-103.94	-115.025
		196678000	-104.956	-115.299
		196680000	-104.013	-116.845
		196683000	-103.451	-117.077
		196685000	-104.964	-117.541
		196688000	-104.733	-116.584
		196690000	-103.991	-117.607
		196693000	-103.653	-117.261
		196695000	-106.121	-117.737
		196698000	-104.564	-117.411
		196700000	-105.905	-116.417
		196703000	-105.793	-116.328
		196705000	-106.367	-116.526
		196708000	-105.814	-116.892
		196710000	-104.971	-115.623
		196713000	-106.309	-116.281
		196715000	-106.307	-116.23
		196718000	-106.603	-118.04
		196720000	-106.71	-117.705
		196723000	-107.356	-117.675
		196725000	-106.918	-118.397
		196728000	-108.675	-118.7
		196730000	-107.599	-118.806
		196733000	-107.388	-118.916
		196735000	-108.544	-118.233
		196738000	-108.054	-118.772
		196740000	-109.38	-118.426
		196743000	-108.644	-118.09
		196745000	-110.354	-118.2
		196748000	-109.51	-119.085
		196750000	-110.146	-118.766
		196753000	-108.821	-118.781
		196755000	-110.467	-119.297
		196758000	-110.982	-118.335
		196760000	-110.649	-119.462
		196763000	-111.279	-118.503
		196765000	-110.126	-117.243
		196768000	-110.834	-118.92
		196770000	-111.968	-118.443
		196773000	-111.764	-118.888
		196775000	-111.583	-118.64
		196778000	-111.63	-117.984
		196780000	-112.173	-118.289
		196783000	-112.062	-119.353
		196785000	-111.635	-118.745
		196788000	-113.499	-119.271
		196790000	-112.901	-118.299
		196793000	-113.082	-119.308
		196795000	-113.736	-118.252
		196798000	-113.734	-118.228
		196800000	-114.545	-118.515
		196803000	-114.6	-118.546
		196805000	-113.86	-118.21
		196808000	-114.065	-118.656
		196810000	-114.918	-118.618
		196813000	-114.648	-119.313
		196815000	-114.722	-118.689
		196818000	-115.499	-118.89
		196820000	-114.675	-118.86
		196823000	-115.034	-119.335
		196825000	-114.642	-119.148
		196828000	-115.568	-119.428
		196830000	-115.551	-119.036
		196833000	-115.166	-119.031
		196835000	-115.705	-118.521
		196838000	-115.684	-118.767
		196840000	-115.363	-119.077
		196843000	-116.8	-118.577
		196845000	-115.763	-118.323
		196848000	-116.192	-119.052
		196850000	-116.105	-118.275
		196853000	-116.203	-118.46
		196855000	-116.1	-119.065
		196858000	-115.601	-119.359
		196860000	-115.771	-118.836
		196863000	-115.963	-118.298
		196865000	-116.104	-118.499
		196868000	-116.417	-118.213
		196870000	-116.341	-118.615
		196873000	-115.799	-118.504
		196875000	-115.96	-119.627
		196878000	-115.939	-119.551
		196880000	-116.234	-118.291
		196883000	-115.75	-119.239
		196885000	-115.901	-118.563
		196888000	-116.693	-119.296
		196890000	-116.479	-118.68
		196893000	-116.961	-119.174
		196895000	-116.339	-119.112
		196898000	-116.264	-118.917
		196900000	-116.221	-118.568
		196903000	-115.699	-118.855
		196905000	-116.239	-118.884
		196908000	-116.696	-118.739
		196910000	-116.76	-118.312
		196913000	-116.139	-118.834
		196915000	-116.472	-118.577
		196918000	-116.378	-119.553
		196920000	-116.458	-118.623
		196923000	-115.874	-119.103
		196925000	-116.558	-118.687
		196928000	-116.312	-119.005
		196930000	-116.483	-118.117
		196933000	-116.17	-118.751
		196935000	-116.932	-118.197
		196938000	-117.316	-118.682
		196940000	-116.708	-118.862
		196943000	-116.742	-118.325
		196945000	-116.098	-118.823
		196948000	-116.673	-118.424
		196950000	-117.41	-118.862
		196953000	-116.231	-118.091
		196955000	-116.165	-118.583
		196958000	-116.835	-119.109
		196960000	-116.753	-118.104
		196963000	-117.028	-119.257
		196965000	-116.778	-118.198
		196968000	-117.24	-118.168
		196970000	-116.182	-118.428
		196973000	-117.118	-118.742
		196975000	-116.478	-118.989
		196978000	-116.665	-118.764
		196980000	-117.652	-118.691
		196983000	-116.292	-119.311
		196985000	-117.435	-118.064
		196988000	-117.375	-119.124
		196990000	-116.168	-119.02
		196993000	-117.536	-118.499
		196995000	-117.711	-119.133
		196998000	-117.43	-118.154
		197000000	-117.954	-119.08
		197003000	-117.394	-118.476
		197005000	-117.039	-118.42
		197008000	-116.993	-118.652
		197010000	-117.732	-118.799
		197013000	-117.974	-118.35
		197015000	-117.745	-118.83
		197018000	-118.266	-119.21
		197020000	-117.722	-118.936
		197023000	-117.059	-118.364
		197025000	-117.966	-119.233
		197028000	-117.313	-118.442
		197030000	-118.269	-119.151
		197033000	-118.355	-118.391
		197035000	-117.854	-118.783
		197038000	-118.153	-119.434
		197040000	-118.52	-118.043
		197043000	-118.061	-119.086
		197045000	-117.827	-119.869
		197048000	-118.381	-118.669
		197050000	-117.832	-119.268
		197053000	-118.661	-118.664
		197055000	-117.697	-119.165
		197058000	-117.924	-119.529
		197060000	-118.46	-118.995
		197063000	-118.138	-118.549
		197065000	-118.237	-119.471
		197068000	-118.135	-118.208
		197070000	-118.053	-117.932
		197073000	-118.094	-118.137
		197075000	-117.888	-118.685
		197078000	-117.728	-118.553
		197080000	-118.04	-118.942
		197083000	-118.978	-118.255
		197085000	-118.772	-117.834
		197088000	-118.429	-119.104
		197090000	-119.136	-118.362
		197093000	-117.697	-118.473
		197095000	-118.816	-118.526
		197098000	-117.979	-118.142
		197100000	-117.98	-119.271
		197103000	-118.842	-118.409
		197105000	-118.311	-118.122
		197108000	-118.931	-118.686
		197110000	-117.814	-118.871
		197113000	-119.053	-119.111
		197115000	-117.976	-118.442
		197118000	-117.9	-119.258
		197120000	-118.344	-118.886
		197123000	-118.919	-118.908
		197125000	-119.284	-118.268
		197128000	-118.188	-119.112
		197130000	-118.605	-119.012
		197133000	-118.684	-118.518
		197135000	-118.128	-118.595
		197138000	-118.142	-118.715
		197140000	-118.373	-118.803
		197143000	-118.03	-118.462
		197145000	-117.879	-119.024
		197148000	-118.902	-119.257
		197150000	-119.206	-119.447
		197153000	-118.574	-118.84
		197155000	-118.177	-119.455
		197158000	-117.07	-118.517
		197160000	-118.528	-118.942
		197163000	-118.154	-118.991
		197165000	-118.518	-118.703
		197168000	-117.865	-118.211
		197170000	-118.639	-119.108
		197173000	-118.779	-118.221
		197175000	-118.982	-118.921
		197178000	-118.247	-118.159
		197180000	-118.878	-118.27
		197183000	-118.347	-118.863
		197185000	-119.022	-118.414
		197188000	-118.296	-119.165
		197190000	-118.527	-118.463
		197193000	-118.436	-117.961
		197195000	-118.181	-118.537
		197198000	-118.467	-118.816
		197200000	-117.969	-119.187
		197203000	-118.661	-118.054
		197205000	-118.277	-119.19
		197208000	-118.821	-119.416
		197210000	-118.173	-119.381
		197213000	-117.668	-118.455
		197215000	-118.934	-119.127
		197218000	-118.656	-118.734
		197220000	-118.397	-118.216
		197223000	-118.492	-119.196
		197225000	-118.314	-118.756
		197228000	-118.042	-118.226
		197230000	-119.341	-119.025
		197233000	-118.933	-118.909
		197235000	-119.251	-118.627
		197238000	-118.39	-118.608
		197240000	-118.069	-118.423
		197243000	-117.993	-118.153
		197245000	-118.953	-118.571
		197248000	-118.567	-118.692
		197250000	-118.55	-118.869
		197253000	-117.884	-118.544
		197255000	-118.604	-118.323
		197258000	-118.631	-119.058
		197260000	-118.75	-118.11
		197263000	-118.208	-118.257
		197265000	-118.21	-119.258
		197268000	-118.54	-118.673
		197270000	-118.368	-118.55
		197273000	-118.271	-118.587
		197275000	-119.208	-119.784
		197278000	-118.059	-117.999
		197280000	-118.68	-119.011
		197283000	-118.726	-119.099
		197285000	-118.117	-118.692
		197288000	-118.456	-118.082
		197290000	-118.973	-118.951
		197293000	-118.222	-118.733
		197295000	-118.406	-118.789
		197298000	-118.629	-119.28
		197300000	-118.079	-118.711
		197303000	-118.67	-118.066
		197305000	-118.564	-118.35
		197308000	-117.95	-119.905
		197310000	-118.294	-118.519
		197313000	-118.707	-118.25
		197315000	-118.612	-118.524
		197318000	-119.687	-118.804
		197320000	-118.673	-118.858
		197323000	-119.076	-118.212
		197325000	-118.241	-119.286
		197328000	-117.905	-119.144
		197330000	-118.624	-119.48
		197333000	-119.359	-118.556
		197335000	-118.628	-119.258
		197338000	-118.46	-119.146
		197340000	-118.996	-117.998
		197343000	-117.984	-118.889
		197345000	-118.627	-118.191
		197348000	-118.697	-118.855
		197350000	-118.129	-119.19
		197353000	-118.281	-118.883
		197355000	-119.306	-118.521
		197358000	-119.073	-118.319
		197360000	-118.155	-118.957
		197363000	-118.781	-118.837
		197365000	-118.592	-118.724
		197368000	-118.312	-118.137
		197370000	-119.362	-119.371
		197373000	-118.353	-118.972
		197375000	-118.428	-117.891
		197378000	-118.787	-118.41
		197380000	-118.341	-117.943
		197383000	-118.337	-118.382
		197385000	-118.737	-118.496
		197388000	-119.458	-118.388
		197390000	-118.719	-119.616
		197393000	-118.495	-118.051
		197395000	-119.746	-118.922
		197398000	-118.856	-118.573
		197400000	-118.584	-119.867
		197403000	-118.014	-119.106
		197405000	-118.884	-119.885
		197408000	-118.857	-119.364
		197410000	-118.078	-118.707
		197413000	-118.54	-119.292
		197415000	-118.62	-119.575
		197418000	-119.704	-118.667
		197420000	-118.665	-118.872
		197423000	-118.576	-118.162
		197425000	-118.606	-118.815
		197428000	-118.437	-118.57
		197430000	-118.469	-119.235
		197433000	-118.874	-118.985
		197435000	-118.571	-118.886
		197438000	-118.871	-118.577
		197440000	-117.968	-119.637
		197443000	-118.085	-118.757
		197445000	-119.367	-118.687
		197448000	-118.596	-118.949
		197450000	-118.293	-119.034
		197453000	-118.454	-119.066
		197455000	-118.859	-119.363
		197458000	-118.805	-119.083
		197460000	-117.921	-118.3
		197463000	-118.532	-119.017
		197465000	-118.686	-118.925
		197468000	-118.424	-118.725
		197470000	-119.111	-119.076
		197473000	-118.42	-119.95
		197475000	-118.62	-118.473
		197478000	-119.862	-118.881
		197480000	-118.37	-118.452
		197483000	-118.664	-118.397
		197485000	-119.25	-118.1
		197488000	-117.841	-118.608
		197490000	-118.481	-118.883
		197493000	-119.002	-119.177
		197495000	-118.79	-118.713
		197498000	-118.408	-118.276
		197500000	-118.638	-118.939

## Sheet: Figure 2d
Figure 2d		Input power (dBm)	-2	-4	-6	-8	-10	-12	-14	-16	-18	-20	-22	-24	-26
		Frequency	Transmission
		Hz	linear scale, 1
		196000000	2.83937e-05	2.93019e-05	2.92181e-05	2.95613e-05	2.94092e-05	2.87935e-05	2.82296e-05	3.05816e-05	2.95281e-05	2.58348e-05	2.85695e-05	3.06802e-05	3.21469e-05
		196002500	2.9187e-05	2.95827e-05	2.93306e-05	2.99107e-05	2.94949e-05	2.96579e-05	3.06471e-05	2.88912e-05	3.08553e-05	2.77287e-05	3.05147e-05	3.05447e-05	2.97523e-05
		196005000	2.91822e-05	2.97077e-05	2.97301e-05	3.00302e-05	3.06376e-05	2.94431e-05	2.94688e-05	2.8358e-05	2.94319e-05	3.23375e-05	3.23676e-05	2.71314e-05	3.11082e-05
		196007500	2.90254e-05	2.9683e-05	3.02284e-05	3.00883e-05	2.96384e-05	3.03523e-05	3.00378e-05	2.81032e-05	3.12537e-05	2.87767e-05	2.87996e-05	3.02152e-05	2.91597e-05
		196010000	2.94311e-05	3.02974e-05	3.05079e-05	3.06877e-05	3.01822e-05	2.99022e-05	2.90464e-05	3.05152e-05	2.94401e-05	2.94256e-05	3.20283e-05	2.95403e-05	3.14731e-05
		196012500	2.99985e-05	3.03558e-05	2.99534e-05	3.12226e-05	3.09126e-05	3.0644e-05	2.93205e-05	3.05968e-05	2.97616e-05	3.2046e-05	3.48409e-05	2.87513e-05	2.63105e-05
		196015000	3.02193e-05	3.0496e-05	3.05318e-05	3.11958e-05	3.10915e-05	3.12104e-05	3.01598e-05	3.09172e-05	2.93885e-05	3.14396e-05	3.07807e-05	3.44433e-05	2.82212e-05
		196017500	3.01503e-05	3.09405e-05	3.08168e-05	3.16022e-05	3.06112e-05	3.08547e-05	3.05621e-05	2.95721e-05	2.92365e-05	2.94682e-05	2.97278e-05	3.00748e-05	2.91661e-05
		196020000	3.0728e-05	3.06723e-05	3.07217e-05	3.17087e-05	3.1501e-05	2.98409e-05	3.05548e-05	3.06248e-05	3.043e-05	3.31727e-05	2.86942e-05	3.04748e-05	3.01565e-05
		196022500	3.05166e-05	3.09925e-05	3.10137e-05	3.21907e-05	3.07941e-05	3.17562e-05	3.10976e-05	3.23043e-05	3.25544e-05	3.24887e-05	3.12736e-05	3.27396e-05	2.83974e-05
		196025000	3.0578e-05	3.14174e-05	3.05663e-05	3.13826e-05	3.12916e-05	3.11392e-05	3.07433e-05	3.12506e-05	3.10022e-05	3.14319e-05	3.12734e-05	3.05762e-05	3.14536e-05
		196027500	3.09174e-05	3.1187e-05	3.10236e-05	3.19996e-05	3.22035e-05	3.18963e-05	3.09941e-05	3.17288e-05	3.12403e-05	2.9292e-05	3.31258e-05	2.96034e-05	3.23839e-05
		196030000	3.09765e-05	3.17369e-05	3.14815e-05	3.24571e-05	3.22627e-05	3.18746e-05	3.08701e-05	3.23807e-05	3.01607e-05	2.99858e-05	2.97217e-05	3.24476e-05	2.77678e-05
		196032500	3.11213e-05	3.16283e-05	3.15786e-05	3.26289e-05	3.23476e-05	3.11892e-05	3.10592e-05	3.10713e-05	3.42638e-05	3.18018e-05	3.00242e-05	3.20144e-05	2.61053e-05
		196035000	3.13326e-05	3.17758e-05	3.15697e-05	3.23207e-05	3.19353e-05	3.15514e-05	3.07444e-05	3.20347e-05	3.28226e-05	3.16516e-05	3.10281e-05	3.22435e-05	3.12338e-05
		196037500	3.13047e-05	3.23228e-05	3.15209e-05	3.22871e-05	3.13781e-05	3.16974e-05	3.25589e-05	3.23604e-05	3.26213e-05	3.14063e-05	3.12211e-05	3.26266e-05	3.91448e-05
		196040000	3.13108e-05	3.15108e-05	3.17995e-05	3.25572e-05	3.18114e-05	3.23448e-05	3.26834e-05	3.13745e-05	3.31852e-05	3.23394e-05	3.28824e-05	3.26798e-05	3.21404e-05
		196042500	3.15348e-05	3.20151e-05	3.19874e-05	3.30493e-05	3.21937e-05	3.14581e-05	3.29307e-05	3.17463e-05	3.32251e-05	3.23935e-05	3.14379e-05	3.16441e-05	3.58672e-05
		196045000	3.17129e-05	3.19769e-05	3.20574e-05	3.30111e-05	3.19912e-05	3.20296e-05	3.11552e-05	3.30268e-05	3.17089e-05	3.28773e-05	3.15108e-05	3.2328e-05	3.40216e-05
		196047500	3.13256e-05	3.16854e-05	3.23827e-05	3.25456e-05	3.20658e-05	3.16838e-05	2.97896e-05	3.18978e-05	3.15382e-05	3.13564e-05	3.11087e-05	3.07588e-05	3.27983e-05
		196050000	3.17489e-05	3.19052e-05	3.24819e-05	3.26425e-05	3.29986e-05	3.23753e-05	3.1796e-05	3.04287e-05	3.24816e-05	3.053e-05	3.26732e-05	3.08602e-05	3.44417e-05
		196052500	3.19571e-05	3.22305e-05	3.22774e-05	3.28119e-05	3.21253e-05	3.15426e-05	3.22178e-05	3.21557e-05	3.39456e-05	3.23058e-05	3.36723e-05	3.52668e-05	3.17731e-05
		196055000	3.20579e-05	3.24274e-05	3.21566e-05	3.28931e-05	3.3067e-05	3.2563e-05	3.15006e-05	3.04423e-05	3.14934e-05	3.43296e-05	3.43294e-05	2.74507e-05	2.93797e-05
		196057500	3.17491e-05	3.26724e-05	3.23811e-05	3.30141e-05	3.22003e-05	3.14522e-05	3.27332e-05	3.21598e-05	3.34882e-05	3.25067e-05	3.07888e-05	3.2886e-05	3.12957e-05
		196060000	3.1989e-05	3.27832e-05	3.20649e-05	3.3388e-05	3.2613e-05	3.22041e-05	3.20172e-05	3.28299e-05	3.24961e-05	3.27172e-05	3.56538e-05	3.50352e-05	3.10477e-05
		196062500	3.2079e-05	3.21966e-05	3.22563e-05	3.34514e-05	3.19149e-05	3.21896e-05	3.2339e-05	3.3429e-05	3.14654e-05	3.21763e-05	3.18166e-05	3.24304e-05	2.76025e-05
		196065000	3.23106e-05	3.24756e-05	3.26906e-05	3.30797e-05	3.27899e-05	3.18351e-05	3.16251e-05	3.19837e-05	3.24654e-05	3.16739e-05	3.07138e-05	3.44316e-05	3.25687e-05
		196067500	3.20474e-05	3.22579e-05	3.29482e-05	3.37945e-05	3.30487e-05	3.2469e-05	3.30835e-05	3.12101e-05	3.21931e-05	3.07109e-05	2.95826e-05	3.63103e-05	3.50579e-05
		196070000	3.2197e-05	3.20978e-05	3.25695e-05	3.33807e-05	3.27927e-05	3.22202e-05	3.26865e-05	3.17986e-05	3.29197e-05	3.22888e-05	3.45222e-05	3.05783e-05	2.8908e-05
		196072500	3.2414e-05	3.2722e-05	3.2476e-05	3.35249e-05	3.29179e-05	3.28772e-05	3.2072e-05	3.36863e-05	3.441e-05	3.47138e-05	3.20129e-05	3.12217e-05	3.73921e-05
		196075000	3.21697e-05	3.30563e-05	3.31592e-05	3.32781e-05	3.33896e-05	3.30804e-05	3.24505e-05	3.35548e-05	3.40475e-05	3.41348e-05	3.07619e-05	3.26716e-05	3.69871e-05
		196077500	3.20648e-05	3.28996e-05	3.31508e-05	3.33271e-05	3.31461e-05	3.28758e-05	3.38209e-05	3.31485e-05	3.50184e-05	3.17025e-05	3.38197e-05	3.36293e-05	3.45626e-05
		196080000	3.21733e-05	3.25088e-05	3.2417e-05	3.3845e-05	3.29227e-05	3.33267e-05	3.2375e-05	3.15522e-05	3.353e-05	3.43426e-05	3.26917e-05	3.18521e-05	2.98634e-05
		196082500	3.23317e-05	3.32676e-05	3.27443e-05	3.30931e-05	3.22261e-05	3.13227e-05	3.26963e-05	3.29456e-05	3.31889e-05	3.25415e-05	3.25062e-05	3.59338e-05	2.57829e-05
		196085000	3.21973e-05	3.25106e-05	3.20061e-05	3.27547e-05	3.35987e-05	3.2331e-05	3.18825e-05	3.27702e-05	3.14077e-05	3.2418e-05	2.851e-05	3.22433e-05	3.54505e-05
		196087500	3.21636e-05	3.32739e-05	3.25732e-05	3.31992e-05	3.38605e-05	3.35885e-05	3.25448e-05	3.34531e-05	3.42258e-05	3.42953e-05	3.17426e-05	2.85854e-05	3.06418e-05
		196090000	3.23602e-05	3.27877e-05	3.23236e-05	3.36677e-05	3.35177e-05	3.22439e-05	3.32171e-05	3.25343e-05	3.19285e-05	3.44151e-05	2.9667e-05	3.75977e-05	3.23113e-05
		196092500	3.18253e-05	3.28047e-05	3.25194e-05	3.29866e-05	3.28866e-05	3.29722e-05	3.1745e-05	3.12717e-05	3.36169e-05	3.09132e-05	3.26647e-05	3.20795e-05	3.83359e-05
		196095000	3.18732e-05	3.24506e-05	3.23784e-05	3.38276e-05	3.2925e-05	3.22926e-05	3.23277e-05	3.24069e-05	3.56666e-05	3.10313e-05	2.84574e-05	3.06664e-05	3.46825e-05
		196097500	3.20335e-05	3.24721e-05	3.21915e-05	3.25609e-05	3.26663e-05	3.27164e-05	3.30335e-05	3.36518e-05	3.47904e-05	3.13855e-05	3.29024e-05	3.25194e-05	2.89251e-05
		196100000	3.18214e-05	3.25524e-05	3.22603e-05	3.28246e-05	3.29784e-05	3.21179e-05	3.18127e-05	3.15751e-05	3.25867e-05	3.35548e-05	3.13907e-05	3.24151e-05	3.58096e-05
		196102500	3.16645e-05	3.20689e-05	3.17517e-05	3.30002e-05	3.2751e-05	3.26596e-05	3.29095e-05	3.15605e-05	3.1905e-05	3.07108e-05	3.14375e-05	2.59487e-05	3.33274e-05
		196105000	3.1603e-05	3.21955e-05	3.23273e-05	3.29274e-05	3.19614e-05	3.1736e-05	3.12908e-05	3.12959e-05	3.23108e-05	3.30245e-05	3.08609e-05	3.32666e-05	3.06613e-05
		196107500	3.15217e-05	3.20676e-05	3.18593e-05	3.2596e-05	3.28723e-05	3.22322e-05	3.15257e-05	2.92526e-05	3.18915e-05	3.39216e-05	3.1411e-05	3.33804e-05	3.72131e-05
		196110000	3.15945e-05	3.2073e-05	3.19155e-05	3.31151e-05	3.25036e-05	3.16017e-05	3.20036e-05	3.17442e-05	3.2986e-05	3.29321e-05	2.97856e-05	3.22813e-05	3.13056e-05
		196112500	3.16156e-05	3.20537e-05	3.19388e-05	3.2072e-05	3.19211e-05	3.25305e-05	3.09745e-05	3.28462e-05	3.19631e-05	3.21679e-05	2.91188e-05	2.88579e-05	3.04873e-05
		196115000	3.14507e-05	3.15132e-05	3.19297e-05	3.22443e-05	3.19976e-05	3.14224e-05	3.07724e-05	3.24765e-05	3.38973e-05	3.01091e-05	3.06113e-05	3.53456e-05	3.55025e-05
		196117500	3.17814e-05	3.2271e-05	3.14397e-05	3.30531e-05	3.26891e-05	3.21553e-05	3.21016e-05	3.30239e-05	3.01181e-05	2.9324e-05	3.27659e-05	2.93466e-05	3.10267e-05
		196120000	3.15119e-05	3.19921e-05	3.21758e-05	3.26702e-05	3.2893e-05	3.19209e-05	3.12761e-05	3.14599e-05	2.92973e-05	3.15823e-05	3.25735e-05	3.39875e-05	3.58516e-05
		196122500	3.15177e-05	3.2147e-05	3.20817e-05	3.24908e-05	3.22902e-05	3.17334e-05	3.17573e-05	3.18815e-05	3.1445e-05	3.2147e-05	3.14986e-05	3.37134e-05	3.50712e-05
		196125000	3.14932e-05	3.22022e-05	3.22938e-05	3.26199e-05	3.21911e-05	3.20533e-05	3.11417e-05	3.18074e-05	3.30865e-05	3.29102e-05	3.24695e-05	3.47785e-05	3.01899e-05
		196127500	3.18665e-05	3.23981e-05	3.19306e-05	3.3411e-05	3.25394e-05	3.1704e-05	3.22139e-05	3.08173e-05	3.26295e-05	3.18788e-05	3.50346e-05	3.23794e-05	3.26683e-05
		196130000	3.19378e-05	3.25045e-05	3.2674e-05	3.3159e-05	3.22536e-05	3.23076e-05	3.13905e-05	3.2094e-05	3.39179e-05	3.30806e-05	3.20687e-05	3.18027e-05	2.82204e-05
		196132500	3.22082e-05	3.23799e-05	3.20483e-05	3.3051e-05	3.2254e-05	3.26625e-05	3.24219e-05	3.26604e-05	3.22899e-05	3.3762e-05	3.21813e-05	3.32305e-05	3.1335e-05
		196135000	3.22686e-05	3.28436e-05	3.26831e-05	3.33995e-05	3.30163e-05	3.28391e-05	3.26745e-05	3.13495e-05	3.29516e-05	3.31836e-05	2.94564e-05	3.28837e-05	2.81592e-05
		196137500	3.23298e-05	3.31922e-05	3.25491e-05	3.40153e-05	3.32833e-05	3.23236e-05	3.40864e-05	3.29042e-05	3.28995e-05	3.43705e-05	3.60567e-05	3.44932e-05	2.96849e-05
		196140000	3.22851e-05	3.32927e-05	3.30378e-05	3.37635e-05	3.33344e-05	3.32663e-05	3.34668e-05	3.1999e-05	3.39804e-05	3.23934e-05	3.37483e-05	3.56118e-05	3.31174e-05
		196142500	3.27394e-05	3.3024e-05	3.28699e-05	3.44299e-05	3.38531e-05	3.33055e-05	3.25699e-05	3.21413e-05	3.19708e-05	3.17882e-05	3.51987e-05	3.79063e-05	3.60346e-05
		196145000	3.28659e-05	3.35742e-05	3.32666e-05	3.45852e-05	3.3408e-05	3.27622e-05	3.33199e-05	3.42623e-05	3.46925e-05	3.22945e-05	3.41587e-05	3.17268e-05	3.66329e-05
		196147500	3.28431e-05	3.33721e-05	3.30647e-05	3.416e-05	3.37829e-05	3.29645e-05	3.4086e-05	3.2923e-05	3.47511e-05	3.32572e-05	3.65459e-05	3.74036e-05	3.8167e-05
		196150000	3.31992e-05	3.3909e-05	3.39683e-05	3.48359e-05	3.43283e-05	3.30411e-05	3.35405e-05	3.36355e-05	3.33916e-05	3.44132e-05	3.24264e-05	2.86726e-05	3.00614e-05
		196152500	3.32738e-05	3.43118e-05	3.33071e-05	3.47534e-05	3.42743e-05	3.27528e-05	3.30611e-05	3.33219e-05	3.3781e-05	3.33457e-05	3.02095e-05	3.42666e-05	3.61819e-05
		196155000	3.34739e-05	3.38432e-05	3.41822e-05	3.49181e-05	3.40369e-05	3.34994e-05	3.4226e-05	3.23142e-05	3.48884e-05	3.64849e-05	3.47464e-05	3.6555e-05	3.73633e-05
		196157500	3.38219e-05	3.48055e-05	3.3724e-05	3.52456e-05	3.43372e-05	3.4735e-05	3.42155e-05	3.37545e-05	3.52166e-05	3.54878e-05	3.35817e-05	3.23815e-05	3.14065e-05
		196160000	3.39197e-05	3.44526e-05	3.42271e-05	3.54755e-05	3.4848e-05	3.3656e-05	3.43974e-05	3.57149e-05	3.47978e-05	3.71385e-05	3.37801e-05	3.27525e-05	3.22586e-05
		196162500	3.39546e-05	3.50065e-05	3.45081e-05	3.62479e-05	3.45538e-05	3.48292e-05	3.42665e-05	3.36025e-05	3.44649e-05	3.49316e-05	3.27463e-05	3.76525e-05	3.70876e-05
		196165000	3.45397e-05	3.50313e-05	3.50564e-05	3.5725e-05	3.55336e-05	3.49193e-05	3.51803e-05	3.41542e-05	3.60366e-05	3.61184e-05	3.29886e-05	3.42957e-05	3.69424e-05
		196167500	3.51138e-05	3.56394e-05	3.54957e-05	3.64534e-05	3.49255e-05	3.60844e-05	3.47853e-05	3.51754e-05	3.50415e-05	3.36584e-05	3.62842e-05	3.39401e-05	3.79317e-05
		196170000	3.52433e-05	3.54422e-05	3.55427e-05	3.66575e-05	3.64966e-05	3.5618e-05	3.46605e-05	3.64442e-05	3.43528e-05	3.83724e-05	3.45269e-05	3.27918e-05	3.46341e-05
		196172500	3.55373e-05	3.60266e-05	3.5819e-05	3.65205e-05	3.72762e-05	3.56821e-05	3.55449e-05	3.59324e-05	3.54709e-05	3.76009e-05	3.81044e-05	3.72127e-05	3.75668e-05
		196175000	3.63861e-05	3.67652e-05	3.61378e-05	3.7655e-05	3.70214e-05	3.63529e-05	3.70018e-05	3.78709e-05	3.74441e-05	3.71722e-05	3.5905e-05	3.69936e-05	3.72571e-05
		196177500	3.67878e-05	3.70087e-05	3.67548e-05	3.8085e-05	3.78796e-05	3.69446e-05	3.6801e-05	3.76039e-05	3.75093e-05	3.78671e-05	3.71284e-05	3.68982e-05	3.62915e-05
		196180000	3.7117e-05	3.77517e-05	3.75942e-05	3.85587e-05	3.72656e-05	3.7845e-05	3.77504e-05	3.7098e-05	3.69578e-05	3.49987e-05	3.74663e-05	3.70163e-05	3.89179e-05
		196182500	3.76478e-05	3.8144e-05	3.7936e-05	3.88524e-05	3.87123e-05	3.82501e-05	3.86862e-05	3.70699e-05	3.94002e-05	3.70828e-05	3.96989e-05	3.80644e-05	4.06671e-05
		196185000	3.8217e-05	3.86631e-05	3.82242e-05	3.91538e-05	3.91831e-05	3.9586e-05	3.95686e-05	3.91245e-05	3.91536e-05	3.77461e-05	3.80911e-05	3.70639e-05	4.03874e-05
		196187500	3.86821e-05	3.90656e-05	3.92523e-05	4.07746e-05	3.8684e-05	4.03909e-05	4.01111e-05	3.88273e-05	4.07855e-05	4.10774e-05	3.51781e-05	4.34909e-05	4.30472e-05
		196190000	3.91803e-05	3.98444e-05	3.94573e-05	4.05791e-05	4.00835e-05	3.93846e-05	3.88648e-05	3.88374e-05	3.96268e-05	4.0607e-05	4.15622e-05	3.86907e-05	4.75072e-05
		196192500	3.99808e-05	4.05518e-05	4.00305e-05	4.16976e-05	4.08147e-05	3.95049e-05	4.04882e-05	3.91247e-05	4.12384e-05	3.85818e-05	4.3406e-05	3.89632e-05	4.1373e-05
		196195000	4.07635e-05	4.13032e-05	4.10056e-05	4.22135e-05	4.179e-05	4.11982e-05	4.0856e-05	4.07987e-05	4.19888e-05	4.09849e-05	4.1484e-05	4.24022e-05	4.32812e-05
		196197500	4.13101e-05	4.15059e-05	4.17019e-05	4.28123e-05	4.11296e-05	4.20487e-05	4.21331e-05	4.29036e-05	4.29302e-05	3.90592e-05	4.22611e-05	4.11868e-05	4.29882e-05
		196200000	4.1615e-05	4.20055e-05	4.20393e-05	4.32814e-05	4.2266e-05	4.21987e-05	4.16449e-05	4.17799e-05	4.10103e-05	4.40038e-05	4.30702e-05	4.17717e-05	4.39923e-05
		196202500	4.19375e-05	4.2732e-05	4.3246e-05	4.33075e-05	4.34618e-05	4.24211e-05	4.27145e-05	4.42425e-05	3.89256e-05	4.36528e-05	4.12721e-05	4.03866e-05	3.734e-05
		196205000	4.2679e-05	4.30085e-05	4.30181e-05	4.35832e-05	4.32716e-05	4.37819e-05	4.25214e-05	4.22783e-05	4.34316e-05	4.37047e-05	3.96742e-05	4.27342e-05	4.12377e-05
		196207500	4.28638e-05	4.3262e-05	4.31574e-05	4.4232e-05	4.3409e-05	4.22844e-05	4.36755e-05	4.35701e-05	4.13387e-05	4.6339e-05	4.32197e-05	4.2007e-05	4.72819e-05
		196210000	4.32576e-05	4.33568e-05	4.36539e-05	4.43711e-05	4.39978e-05	4.40436e-05	4.40388e-05	4.30511e-05	4.39415e-05	4.34505e-05	4.38862e-05	4.35153e-05	3.9083e-05
		196212500	4.29339e-05	4.34389e-05	4.35446e-05	4.41654e-05	4.36878e-05	4.26077e-05	4.35862e-05	4.23106e-05	4.53988e-05	4.29888e-05	4.42934e-05	4.72961e-05	4.57205e-05
		196215000	4.27641e-05	4.34846e-05	4.31732e-05	4.41645e-05	4.2975e-05	4.26153e-05	4.30972e-05	4.3748e-05	4.4573e-05	4.25062e-05	4.56553e-05	4.0259e-05	3.66744e-05
		196217500	4.25043e-05	4.29801e-05	4.29013e-05	4.43749e-05	4.30247e-05	4.29384e-05	4.23184e-05	4.20638e-05	4.42283e-05	4.36139e-05	4.38654e-05	4.35296e-05	4.22342e-05
		196220000	4.17397e-05	4.26637e-05	4.21448e-05	4.25378e-05	4.18808e-05	4.17264e-05	4.10248e-05	4.27626e-05	4.09247e-05	4.16183e-05	4.23505e-05	3.89945e-05	4.4808e-05
		196222500	4.07667e-05	4.08791e-05	4.10611e-05	4.17262e-05	4.19999e-05	4.18544e-05	4.04375e-05	4.12984e-05	3.9586e-05	4.09113e-05	3.75676e-05	3.84441e-05	3.74672e-05
		196225000	3.96302e-05	4.0142e-05	3.98888e-05	4.04752e-05	3.96647e-05	3.99505e-05	3.99162e-05	3.99213e-05	4.20656e-05	4.09004e-05	3.94163e-05	3.68405e-05	3.7304e-05
		196227500	3.83365e-05	3.89216e-05	3.84021e-05	3.95587e-05	3.82857e-05	3.83057e-05	3.87529e-05	3.70585e-05	3.85437e-05	3.96673e-05	3.93055e-05	4.03413e-05	3.69855e-05
		196230000	3.69279e-05	3.75184e-05	3.70861e-05	3.83662e-05	3.7408e-05	3.67646e-05	3.709e-05	3.74637e-05	3.62927e-05	3.66265e-05	3.34283e-05	3.38447e-05	3.48952e-05
		196232500	3.54853e-05	3.58878e-05	3.50608e-05	3.61763e-05	3.61614e-05	3.51653e-05	3.50843e-05	3.69262e-05	3.38263e-05	3.52244e-05	3.62694e-05	3.2429e-05	3.32532e-05
		196235000	3.37646e-05	3.45553e-05	3.45729e-05	3.44195e-05	3.47673e-05	3.49817e-05	3.38108e-05	3.38111e-05	3.35043e-05	3.17977e-05	3.36515e-05	3.39907e-05	3.4534e-05
		196237500	3.24219e-05	3.31882e-05	3.26946e-05	3.34438e-05	3.2599e-05	3.32643e-05	3.20642e-05	3.24566e-05	3.41338e-05	3.11222e-05	3.12519e-05	3.11609e-05	2.97717e-05
		196240000	3.10882e-05	3.17375e-05	3.12891e-05	3.211e-05	3.16092e-05	3.04336e-05	3.17602e-05	3.00298e-05	3.3195e-05	3.01498e-05	2.8992e-05	3.20854e-05	3.10422e-05
		196242500	2.99682e-05	3.06903e-05	2.99735e-05	3.14581e-05	3.06166e-05	3.04547e-05	2.94666e-05	3.06065e-05	2.88264e-05	2.74684e-05	3.03337e-05	3.13955e-05	3.15081e-05
		196245000	2.91182e-05	2.93497e-05	2.91354e-05	3.0074e-05	2.97327e-05	3.03641e-05	2.89264e-05	2.8056e-05	2.86887e-05	3.06475e-05	3.14759e-05	3.00466e-05	2.60033e-05
		196247500	2.79876e-05	2.90366e-05	2.86839e-05	2.93671e-05	2.87637e-05	2.79494e-05	2.71519e-05	2.63343e-05	2.70301e-05	2.83335e-05	2.91107e-05	3.29315e-05	2.64028e-05
		196250000	2.74833e-05	2.79743e-05	2.78977e-05	2.84363e-05	2.82422e-05	2.89677e-05	2.7576e-05	2.68934e-05	2.64159e-05	2.73105e-05	2.71085e-05	2.88802e-05	3.16041e-05
		196252500	2.66563e-05	2.74176e-05	2.72239e-05	2.78076e-05	2.7671e-05	2.78242e-05	2.61468e-05	2.73147e-05	2.68177e-05	2.7959e-05	3.00067e-05	2.5445e-05	2.7682e-05
		196255000	2.65015e-05	2.66869e-05	2.67242e-05	2.75394e-05	2.71211e-05	2.72404e-05	2.52775e-05	2.61735e-05	2.66345e-05	2.59785e-05	2.77635e-05	2.4584e-05	2.70191e-05
		196257500	2.62147e-05	2.67786e-05	2.63773e-05	2.68086e-05	2.65523e-05	2.69215e-05	2.74388e-05	2.69599e-05	2.69449e-05	2.86601e-05	2.46171e-05	2.6252e-05	2.5204e-05
		196260000	2.57704e-05	2.64855e-05	2.64486e-05	2.71488e-05	2.61621e-05	2.67539e-05	2.52789e-05	2.59568e-05	2.71426e-05	2.59905e-05	2.67514e-05	2.61775e-05	2.07122e-05
		196262500	2.57378e-05	2.64131e-05	2.5923e-05	2.65244e-05	2.67702e-05	2.64773e-05	2.68648e-05	2.61551e-05	2.71992e-05	2.51904e-05	2.42399e-05	2.84664e-05	2.76013e-05
		196265000	2.56462e-05	2.62586e-05	2.57938e-05	2.67517e-05	2.62887e-05	2.62473e-05	2.48023e-05	2.59512e-05	2.63393e-05	2.4354e-05	2.5436e-05	2.47788e-05	2.88981e-05
		196267500	2.57866e-05	2.59512e-05	2.58789e-05	2.6839e-05	2.68104e-05	2.63343e-05	2.51576e-05	2.60674e-05	2.61047e-05	2.70386e-05	2.51577e-05	2.56631e-05	2.529e-05
		196270000	2.57783e-05	2.60716e-05	2.58696e-05	2.74451e-05	2.65155e-05	2.57322e-05	2.57017e-05	2.53359e-05	2.67681e-05	2.70657e-05	2.57555e-05	2.79879e-05	2.66455e-05
		196272500	2.55731e-05	2.60293e-05	2.6383e-05	2.68767e-05	2.68567e-05	2.6424e-05	2.56555e-05	2.66002e-05	2.74955e-05	2.55763e-05	2.54283e-05	2.81222e-05	2.71396e-05
		196275000	2.58024e-05	2.65847e-05	2.62344e-05	2.75845e-05	2.67711e-05	2.61014e-05	2.56101e-05	2.55467e-05	2.70518e-05	2.8001e-05	2.91867e-05	2.49713e-05	2.7902e-05
		196277500	2.59353e-05	2.69057e-05	2.64255e-05	2.74752e-05	2.6981e-05	2.72137e-05	2.63404e-05	2.62755e-05	2.62966e-05	2.61151e-05	2.83174e-05	3.00419e-05	2.87492e-05
		196280000	2.64374e-05	2.67363e-05	2.67488e-05	2.72694e-05	2.67192e-05	2.69606e-05	2.71327e-05	2.53786e-05	2.64444e-05	2.69336e-05	2.91593e-05	3.00261e-05	2.67373e-05
		196282500	2.64963e-05	2.72543e-05	2.67946e-05	2.73932e-05	2.7728e-05	2.60969e-05	2.57807e-05	2.71758e-05	2.83259e-05	2.76174e-05	2.82827e-05	2.37483e-05	2.99317e-05
		196285000	2.68037e-05	2.69272e-05	2.74327e-05	2.78929e-05	2.72617e-05	2.6713e-05	2.72507e-05	2.82625e-05	2.68393e-05	2.63827e-05	2.99894e-05	2.77865e-05	3.40235e-05
		196287500	2.71378e-05	2.76523e-05	2.77368e-05	2.85402e-05	2.77627e-05	2.78549e-05	2.70281e-05	2.73721e-05	2.89606e-05	2.70785e-05	2.97415e-05	2.98084e-05	2.38431e-05
		196290000	2.71454e-05	2.79699e-05	2.78461e-05	2.84261e-05	2.80109e-05	2.79985e-05	2.91257e-05	2.9673e-05	2.69994e-05	2.99878e-05	2.57247e-05	2.43833e-05	3.02285e-05
		196292500	2.7253e-05	2.8165e-05	2.83429e-05	2.89365e-05	2.80696e-05	2.79479e-05	2.92098e-05	2.69477e-05	2.97532e-05	2.84034e-05	2.93816e-05	2.68081e-05	2.91642e-05
		196295000	2.82763e-05	2.85921e-05	2.88024e-05	2.90487e-05	2.85473e-05	2.84369e-05	2.92563e-05	2.87643e-05	2.9753e-05	2.8568e-05	3.20519e-05	3.02757e-05	2.8552e-05
		196297500	2.83569e-05	2.87512e-05	2.89642e-05	2.97326e-05	2.88303e-05	2.91339e-05	2.79732e-05	2.86832e-05	3.00261e-05	2.79954e-05	2.95696e-05	3.01498e-05	2.4929e-05
		196300000	2.89883e-05	2.91766e-05	2.94726e-05	3.07855e-05	2.95281e-05	2.92464e-05	2.9579e-05	2.96065e-05	3.07345e-05	2.93813e-05	3.13675e-05	3.23589e-05	3.09691e-05
		196302500	2.94778e-05	2.97272e-05	2.93898e-05	3.06228e-05	3.02048e-05	2.94393e-05	2.93729e-05	2.8307e-05	2.87831e-05	3.15068e-05	2.94889e-05	3.01981e-05	3.09522e-05
		196305000	2.97124e-05	3.04865e-05	3.03881e-05	3.04759e-05	3.04522e-05	3.08215e-05	2.93185e-05	3.02714e-05	3.07325e-05	3.13073e-05	3.05422e-05	2.95928e-05	2.71278e-05
		196307500	3.0279e-05	3.04684e-05	3.05753e-05	3.12492e-05	3.05048e-05	3.06629e-05	3.01746e-05	3.18557e-05	3.17287e-05	3.23973e-05	3.20019e-05	3.08594e-05	2.76624e-05
		196310000	3.04383e-05	3.09938e-05	3.0775e-05	3.16426e-05	3.13903e-05	3.177e-05	3.10014e-05	3.29113e-05	3.07379e-05	3.03569e-05	3.11459e-05	3.03389e-05	3.00052e-05
		196312500	3.07372e-05	3.11008e-05	3.13884e-05	3.2377e-05	3.17003e-05	3.05708e-05	3.12097e-05	3.17274e-05	3.32355e-05	3.10076e-05	3.17164e-05	3.10978e-05	3.47432e-05
		196315000	3.12288e-05	3.2008e-05	3.19091e-05	3.25761e-05	3.27688e-05	3.14081e-05	3.1207e-05	3.27383e-05	3.2445e-05	3.6023e-05	3.1771e-05	3.02787e-05	3.78287e-05
		196317500	3.18804e-05	3.20544e-05	3.22353e-05	3.34125e-05	3.2457e-05	3.2469e-05	3.28918e-05	3.31916e-05	3.17557e-05	3.13859e-05	3.22847e-05	3.12632e-05	2.82569e-05
		196320000	3.24653e-05	3.29982e-05	3.36385e-05	3.34949e-05	3.4039e-05	3.27698e-05	3.18314e-05	3.31985e-05	3.48723e-05	3.46476e-05	3.48898e-05	3.07716e-05	2.90092e-05
		196322500	3.29337e-05	3.31039e-05	3.34438e-05	3.41913e-05	3.33941e-05	3.36867e-05	3.30085e-05	3.41305e-05	3.36309e-05	3.39865e-05	3.19221e-05	3.60082e-05	3.59387e-05
		196325000	3.33908e-05	3.39288e-05	3.36814e-05	3.47973e-05	3.42351e-05	3.41702e-05	3.32521e-05	3.29083e-05	3.55464e-05	3.68748e-05	3.24711e-05	2.97108e-05	3.70531e-05
		196327500	3.40539e-05	3.43495e-05	3.39532e-05	3.52036e-05	3.5195e-05	3.43674e-05	3.42508e-05	3.45546e-05	3.3262e-05	3.4643e-05	3.37025e-05	3.30522e-05	3.59209e-05
		196330000	3.43162e-05	3.50397e-05	3.50979e-05	3.62004e-05	3.53004e-05	3.4181e-05	3.52755e-05	3.55631e-05	3.51957e-05	3.64701e-05	3.68431e-05	3.74235e-05	3.38395e-05
		196332500	3.53437e-05	3.58155e-05	3.57945e-05	3.64886e-05	3.5653e-05	3.56683e-05	3.55923e-05	3.56708e-05	3.82393e-05	3.62691e-05	3.85882e-05	3.65553e-05	3.41039e-05
		196335000	3.58459e-05	3.57033e-05	3.64212e-05	3.7156e-05	3.63137e-05	3.69418e-05	3.63391e-05	3.52953e-05	3.71562e-05	3.83842e-05	3.67952e-05	4.1119e-05	3.4494e-05
		196337500	3.64222e-05	3.64272e-05	3.67632e-05	3.74244e-05	3.71229e-05	3.68115e-05	3.61882e-05	3.56556e-05	3.64025e-05	3.87089e-05	3.80392e-05	3.69004e-05	3.62615e-05
		196340000	3.66629e-05	3.71785e-05	3.74774e-05	3.79818e-05	3.70452e-05	3.65576e-05	3.67026e-05	3.62746e-05	3.9794e-05	3.87122e-05	3.67474e-05	3.48536e-05	4.73622e-05
		196342500	3.76062e-05	3.84057e-05	3.83391e-05	3.86497e-05	3.79181e-05	3.75921e-05	3.82421e-05	3.68928e-05	3.80023e-05	3.64782e-05	3.92768e-05	3.81475e-05	3.73028e-05
		196345000	3.81579e-05	3.88487e-05	3.8821e-05	3.95399e-05	3.93759e-05	3.82303e-05	3.88097e-05	3.88589e-05	3.83041e-05	3.95357e-05	3.76728e-05	3.53598e-05	3.97734e-05
		196347500	3.8347e-05	3.91655e-05	3.94428e-05	4.02175e-05	3.96154e-05	3.88366e-05	3.81695e-05	4.02021e-05	3.90461e-05	3.97503e-05	3.53674e-05	4.04049e-05	3.72352e-05
		196350000	3.9373e-05	4.02245e-05	3.98336e-05	4.06699e-05	4.01137e-05	4.00258e-05	3.95996e-05	3.87418e-05	4.15095e-05	4.15423e-05	3.94007e-05	3.83981e-05	4.04972e-05
		196352500	3.99312e-05	4.09526e-05	3.99853e-05	4.15646e-05	4.04663e-05	3.99972e-05	4.11412e-05	3.89843e-05	3.90347e-05	4.10455e-05	4.23838e-05	4.28478e-05	4.46014e-05
		196355000	4.05879e-05	4.08812e-05	4.1008e-05	4.20163e-05	4.19944e-05	4.12577e-05	3.97075e-05	4.13883e-05	4.12739e-05	3.95891e-05	4.2269e-05	4.01681e-05	4.11306e-05
		196357500	4.11339e-05	4.20831e-05	4.13516e-05	4.31037e-05	4.2566e-05	4.18821e-05	4.1907e-05	4.11137e-05	4.13398e-05	4.40245e-05	4.49637e-05	4.31219e-05	4.28168e-05
		196360000	4.18949e-05	4.23628e-05	4.23014e-05	4.31477e-05	4.39595e-05	4.23793e-05	4.26964e-05	4.23716e-05	4.26822e-05	4.40061e-05	4.48895e-05	4.54633e-05	4.82605e-05
		196362500	4.22058e-05	4.28045e-05	4.26466e-05	4.42521e-05	4.28526e-05	4.41406e-05	4.2382e-05	4.35634e-05	4.6726e-05	4.26576e-05	4.60469e-05	4.72889e-05	4.21568e-05
		196365000	4.34988e-05	4.36533e-05	4.40659e-05	4.48478e-05	4.43122e-05	4.38289e-05	4.4374e-05	4.28946e-05	4.33852e-05	4.53385e-05	4.64855e-05	4.21438e-05	4.64105e-05
		196367500	4.38446e-05	4.44814e-05	4.36974e-05	4.52468e-05	4.56356e-05	4.39793e-05	4.44631e-05	4.34821e-05	4.44545e-05	4.56679e-05	4.18439e-05	4.01663e-05	4.3855e-05
		196370000	4.51086e-05	4.51043e-05	4.47827e-05	4.63605e-05	4.60951e-05	4.50361e-05	4.43291e-05	4.30869e-05	4.56074e-05	4.59051e-05	4.76081e-05	5.31753e-05	5.23994e-05
		196372500	4.51128e-05	4.62279e-05	4.55457e-05	4.70445e-05	4.6561e-05	4.52822e-05	4.6451e-05	4.5526e-05	4.78377e-05	4.68464e-05	4.80083e-05	5.19889e-05	4.41103e-05
		196375000	4.60138e-05	4.5946e-05	4.67458e-05	4.78989e-05	4.78507e-05	4.66365e-05	4.58618e-05	4.6288e-05	4.9332e-05	4.7242e-05	4.6002e-05	4.58432e-05	5.13314e-05
		196377500	4.65744e-05	4.75321e-05	4.70292e-05	4.80722e-05	4.82953e-05	4.69919e-05	4.7756e-05	4.68117e-05	5.13215e-05	4.78892e-05	4.95359e-05	4.8956e-05	5.2424e-05
		196380000	4.76049e-05	4.83147e-05	4.79601e-05	4.88571e-05	4.88571e-05	4.90764e-05	4.74092e-05	4.8096e-05	4.82144e-05	5.33748e-05	4.83098e-05	4.60801e-05	5.42439e-05
		196382500	4.89577e-05	4.89589e-05	4.89354e-05	5.00295e-05	4.92501e-05	4.86283e-05	4.84664e-05	4.83239e-05	5.1528e-05	5.19105e-05	4.9317e-05	4.41607e-05	4.63475e-05
		196385000	4.90552e-05	4.94291e-05	4.97096e-05	5.04382e-05	5.02513e-05	4.87358e-05	4.91724e-05	5.06404e-05	5.09942e-05	5.29978e-05	5.10298e-05	5.60654e-05	5.09255e-05
		196387500	5.00108e-05	5.05633e-05	5.06119e-05	5.19561e-05	5.0629e-05	5.04349e-05	5.06924e-05	4.86263e-05	5.03439e-05	5.00834e-05	5.26247e-05	4.98036e-05	5.21885e-05
		196390000	5.08796e-05	5.14028e-05	5.1008e-05	5.2985e-05	5.21018e-05	5.07895e-05	5.12683e-05	5.16521e-05	5.09899e-05	5.64395e-05	5.50562e-05	5.64082e-05	5.20602e-05
		196392500	5.18373e-05	5.21184e-05	5.2285e-05	5.34139e-05	5.35032e-05	5.2279e-05	5.24876e-05	5.25085e-05	5.31016e-05	5.54659e-05	5.49373e-05	4.92257e-05	5.19257e-05
		196395000	5.26553e-05	5.27125e-05	5.24948e-05	5.34352e-05	5.26952e-05	5.27051e-05	5.4263e-05	5.35222e-05	5.52478e-05	5.58785e-05	5.75424e-05	5.90376e-05	5.56491e-05
		196397500	5.35603e-05	5.35887e-05	5.37133e-05	5.51545e-05	5.49723e-05	5.258e-05	5.49641e-05	5.41334e-05	5.61421e-05	5.65476e-05	5.25937e-05	5.50278e-05	4.96415e-05
		196400000	5.5062e-05	5.48037e-05	5.56183e-05	5.61521e-05	5.57585e-05	5.43867e-05	5.42227e-05	5.4619e-05	5.72095e-05	5.66035e-05	5.25618e-05	5.61481e-05	5.32743e-05
		196402500	5.58744e-05	5.5881e-05	5.62341e-05	5.69426e-05	5.57431e-05	5.50245e-05	5.67835e-05	5.7551e-05	5.76664e-05	5.80441e-05	5.76581e-05	6.09315e-05	5.59691e-05
		196405000	5.68362e-05	5.70882e-05	5.71176e-05	5.8033e-05	5.82736e-05	5.78502e-05	5.64405e-05	5.66743e-05	5.84088e-05	5.95946e-05	5.50885e-05	5.6931e-05	5.8454e-05
		196407500	5.78649e-05	5.78457e-05	5.8097e-05	5.93406e-05	5.95939e-05	5.90965e-05	5.86052e-05	5.92444e-05	6.04607e-05	5.68764e-05	5.92943e-05	5.94232e-05	5.47551e-05
		196410000	5.9374e-05	5.89016e-05	5.91775e-05	5.94804e-05	5.95786e-05	5.83077e-05	5.77654e-05	5.90302e-05	6.03833e-05	6.1156e-05	6.21504e-05	5.97903e-05	5.99612e-05
		196412500	6.00832e-05	6.02709e-05	6.09079e-05	6.17924e-05	6.08766e-05	5.85884e-05	6.00346e-05	6.10981e-05	6.2227e-05	6.12889e-05	5.91103e-05	6.18596e-05	6.71893e-05
		196415000	6.18421e-05	6.18365e-05	6.1647e-05	6.3004e-05	6.10664e-05	6.12899e-05	6.2839e-05	6.19491e-05	6.32128e-05	6.33499e-05	6.35613e-05	6.24081e-05	5.60079e-05
		196417500	6.24768e-05	6.23966e-05	6.24458e-05	6.35398e-05	6.37338e-05	6.24288e-05	6.07777e-05	6.37607e-05	6.26491e-05	6.34642e-05	6.05211e-05	6.19431e-05	5.66213e-05
		196420000	6.44052e-05	6.36055e-05	6.36527e-05	6.51282e-05	6.40318e-05	6.34853e-05	6.24885e-05	6.35703e-05	6.53456e-05	6.57537e-05	6.18597e-05	6.84219e-05	6.73937e-05
		196422500	6.49247e-05	6.49254e-05	6.43135e-05	6.58611e-05	6.51327e-05	6.42922e-05	6.73772e-05	6.4989e-05	6.34838e-05	6.79111e-05	6.33213e-05	6.3787e-05	6.7948e-05
		196425000	6.7176e-05	6.58722e-05	6.6234e-05	6.65866e-05	6.68951e-05	6.62482e-05	6.6035e-05	6.48626e-05	6.38244e-05	6.67103e-05	6.62764e-05	6.60496e-05	6.15187e-05
		196427500	6.92189e-05	6.64788e-05	6.69021e-05	6.76597e-05	6.66632e-05	6.79266e-05	6.64554e-05	6.64206e-05	6.77133e-05	6.96604e-05	6.57313e-05	7.29982e-05	6.5827e-05
		196430000	7.00837e-05	6.81981e-05	6.84562e-05	6.89215e-05	6.90477e-05	6.90367e-05	6.69698e-05	6.84733e-05	7.04872e-05	7.2672e-05	6.66956e-05	6.77372e-05	6.6221e-05
		196432500	7.16114e-05	6.86613e-05	6.92406e-05	6.99277e-05	6.92553e-05	6.8545e-05	6.9505e-05	6.9038e-05	7.01452e-05	7.15906e-05	7.26959e-05	6.94225e-05	7.04424e-05
		196435000	7.28568e-05	7.01877e-05	7.01927e-05	7.16333e-05	7.03587e-05	7.03194e-05	6.98588e-05	7.07701e-05	6.968e-05	7.30648e-05	7.09463e-05	7.23797e-05	7.15056e-05
		196437500	7.437e-05	7.14579e-05	7.15232e-05	7.18785e-05	7.147e-05	7.07872e-05	6.96195e-05	7.18959e-05	7.37522e-05	7.45801e-05	7.49803e-05	7.66553e-05	6.87293e-05
		196440000	7.55927e-05	7.25824e-05	7.22457e-05	7.33926e-05	7.1793e-05	7.1818e-05	7.37018e-05	7.17789e-05	7.36969e-05	7.60256e-05	7.49e-05	6.9186e-05	7.62177e-05
		196442500	7.61898e-05	7.29048e-05	7.33777e-05	7.28539e-05	7.38742e-05	7.19138e-05	7.18441e-05	7.52352e-05	7.43712e-05	7.32238e-05	7.60806e-05	8.03735e-05	7.97499e-05
		196445000	7.79128e-05	7.52028e-05	7.41164e-05	7.56211e-05	7.38753e-05	7.39302e-05	7.43423e-05	7.34112e-05	7.49969e-05	7.42698e-05	7.31346e-05	6.98581e-05	8.12366e-05
		196447500	7.8944e-05	7.55315e-05	7.51439e-05	7.5364e-05	7.66756e-05	7.43485e-05	7.51029e-05	7.62498e-05	7.66216e-05	8.03689e-05	7.3367e-05	7.48537e-05	8.29545e-05
		196450000	8.00861e-05	7.68286e-05	7.57898e-05	7.75133e-05	7.82438e-05	7.71473e-05	7.64533e-05	7.83585e-05	7.5172e-05	8.05019e-05	7.69458e-05	7.7002e-05	8.35053e-05
		196452500	8.08707e-05	7.74415e-05	7.70543e-05	7.93314e-05	7.8313e-05	7.76406e-05	7.69249e-05	7.68265e-05	7.93526e-05	7.77023e-05	7.35639e-05	7.79514e-05	7.98877e-05
		196455000	8.19649e-05	7.83359e-05	7.83469e-05	7.91883e-05	7.89372e-05	7.85397e-05	7.63669e-05	7.62067e-05	7.78273e-05	8.27748e-05	7.92322e-05	7.91074e-05	8.48862e-05
		196457500	8.28053e-05	7.95311e-05	7.83154e-05	8.04715e-05	7.86367e-05	7.98212e-05	7.83495e-05	7.99217e-05	8.16402e-05	8.08027e-05	7.94123e-05	8.28337e-05	7.71376e-05
		196460000	8.44098e-05	8.13823e-05	7.98149e-05	8.04131e-05	8.07105e-05	8.06839e-05	7.98737e-05	7.93257e-05	7.81878e-05	8.25981e-05	8.08083e-05	7.86946e-05	7.65332e-05
		196462500	8.53825e-05	8.2527e-05	8.22565e-05	8.26852e-05	8.30325e-05	8.04793e-05	8.05644e-05	8.01955e-05	8.20707e-05	8.34405e-05	8.2075e-05	8.26915e-05	8.30352e-05
		196465000	8.66601e-05	8.38176e-05	8.31283e-05	8.30095e-05	8.36731e-05	8.20805e-05	8.10037e-05	8.20542e-05	8.49742e-05	8.31747e-05	8.35611e-05	8.23427e-05	8.62128e-05
		196467500	8.7622e-05	8.54486e-05	8.37346e-05	8.48602e-05	8.45927e-05	8.46056e-05	8.19243e-05	8.29474e-05	8.39791e-05	8.80848e-05	9.55919e-05	8.93289e-05	8.66673e-05
		196470000	8.75012e-05	8.75363e-05	8.5414e-05	8.63362e-05	8.53937e-05	8.46118e-05	8.52733e-05	8.66339e-05	8.47163e-05	8.41401e-05	8.57302e-05	8.61309e-05	8.18127e-05
		196472500	8.73577e-05	9.01858e-05	8.65619e-05	8.82458e-05	8.74917e-05	8.59777e-05	8.53808e-05	8.64048e-05	8.49675e-05	9.19492e-05	8.97075e-05	8.37176e-05	9.33117e-05
		196475000	8.85631e-05	9.29118e-05	8.81706e-05	8.9216e-05	8.9639e-05	8.74639e-05	8.76107e-05	9.13375e-05	9.04622e-05	8.90201e-05	9.30759e-05	9.21928e-05	8.46734e-05
		196477500	9.02986e-05	9.51941e-05	9.02996e-05	9.06035e-05	9.0438e-05	9.06004e-05	8.89965e-05	9.245e-05	9.01376e-05	8.95058e-05	9.03997e-05	9.27694e-05	9.19274e-05
		196480000	9.2677e-05	9.75151e-05	9.16495e-05	9.28368e-05	9.20941e-05	9.1739e-05	9.13991e-05	9.31412e-05	9.34467e-05	9.87971e-05	9.34874e-05	8.93744e-05	9.20939e-05
		196482500	9.39135e-05	9.94897e-05	9.36283e-05	9.56203e-05	9.48397e-05	9.42104e-05	9.3992e-05	9.16111e-05	9.36837e-05	9.732e-05	9.81784e-05	9.74521e-05	0.000100281
		196485000	9.59982e-05	0.000102455	9.54432e-05	9.77579e-05	9.74429e-05	9.57106e-05	9.51766e-05	9.65491e-05	9.92999e-05	9.90665e-05	9.51389e-05	0.000102083	9.80061e-05
		196487500	9.80478e-05	0.000104973	9.91619e-05	9.93308e-05	0.000100146	9.75996e-05	9.67917e-05	9.80928e-05	0.000101736	0.00010031	9.94759e-05	9.5454e-05	0.000109306
		196490000	9.99353e-05	0.00010688	0.000101403	0.000101902	0.00010196	0.000101978	0.000100917	0.000102803	0.000102629	0.000106869	0.000100471	9.66645e-05	0.000103508
		196492500	0.00010256	0.000110555	0.000103785	0.000104715	0.000103773	0.000104121	0.00010321	0.000105918	0.000103335	0.000105131	0.000107057	0.000108877	9.83089e-05
		196495000	0.000105557	0.000113167	0.000106717	0.00010729	0.000107089	0.000107658	0.000104894	0.000105848	0.000107156	0.000108595	0.000109747	0.000113137	0.000114437
		196497500	0.000108208	0.000116518	0.000110881	0.000109623	0.000112319	0.000109736	0.000107704	0.000111325	0.000110961	0.000115802	0.000113425	0.000111866	0.000119157
		196500000	0.000111004	0.00012034	0.000113476	0.000114389	0.000113477	0.000112248	0.000113791	0.000113047	0.000111342	0.000118846	0.000114742	0.000112764	0.000120712
		196502500	0.000114863	0.000123692	0.000117853	0.000117187	0.000116696	0.000114074	0.000114893	0.000117562	0.000120242	0.000120325	0.000116389	0.000119514	0.000113016
		196505000	0.000117767	0.000127253	0.000122408	0.000121606	0.000120915	0.000120294	0.000121581	0.000118502	0.000124382	0.000125385	0.000125172	0.000128743	0.000122394
		196507500	0.000122084	0.000132185	0.000128079	0.000126801	0.000126221	0.000124302	0.000124114	0.000124816	0.000126237	0.000126505	0.000129107	0.000127929	0.000132769
		196510000	0.000125458	0.000132839	0.000133806	0.000129709	0.000129601	0.000128022	0.000126135	0.000127626	0.000128857	0.000130237	0.000128651	0.000130618	0.000128281
		196512500	0.000129027	0.000134232	0.000141649	0.000133772	0.000134323	0.000132999	0.000131354	0.000132048	0.000134419	0.000142615	0.000141871	0.000134395	0.000128788
		196515000	0.000133707	0.000138651	0.000147939	0.000139684	0.000139173	0.00013739	0.00014003	0.000137582	0.000139339	0.000140396	0.000141115	0.000143777	0.000140571
		196517500	0.000137721	0.000143872	0.000154853	0.000143739	0.000144091	0.000141974	0.000143489	0.000147431	0.000147652	0.000152497	0.000148875	0.000145097	0.000156362
		196520000	0.000142531	0.000148917	0.000161893	0.000149511	0.000150062	0.000149832	0.000148422	0.000149396	0.000152131	0.000148718	0.000157607	0.000155787	0.000155656
		196522500	0.000147051	0.000153868	0.000165914	0.000156374	0.000155071	0.000153764	0.000153037	0.000156652	0.000156369	0.000163498	0.000159029	0.00016397	0.00015572
		196525000	0.000152263	0.000159582	0.000172908	0.000161486	0.00016069	0.000161637	0.000158535	0.000159149	0.000163566	0.000168985	0.000163184	0.000160582	0.000162922
		196527500	0.000158498	0.000165124	0.000180216	0.000169072	0.000168213	0.000167385	0.00016484	0.000170687	0.000171455	0.000172516	0.000171921	0.000169684	0.000181227
		196530000	0.000162725	0.000171826	0.0001865	0.000174822	0.000172353	0.000174878	0.000170729	0.000175244	0.000177027	0.000179949	0.000177833	0.000176859	0.000177747
		196532500	0.000168478	0.000176899	0.000193097	0.000183043	0.000181156	0.000182274	0.000179395	0.000180345	0.000185092	0.00018649	0.000183522	0.000172914	0.000185345
		196535000	0.000175727	0.000182901	0.000200282	0.000191726	0.000189687	0.000186669	0.000184199	0.000189689	0.000185295	0.000189575	0.000191848	0.000200526	0.000186877
		196537500	0.000181704	0.000189336	0.00020729	0.000199521	0.000194451	0.000193037	0.000192415	0.000194654	0.000195824	0.000199172	0.000204466	0.000196943	0.000196974
		196540000	0.000187383	0.000196544	0.000215206	0.000209186	0.000202512	0.000201069	0.000202387	0.000202849	0.000205372	0.000207774	0.000216417	0.000199703	0.000215092
		196542500	0.000193494	0.000202931	0.000217589	0.000222171	0.000210489	0.000210345	0.00020807	0.000211085	0.000220248	0.000215816	0.000220506	0.000217865	0.000218926
		196545000	0.000201141	0.000210128	0.000220215	0.000238908	0.000220687	0.000220182	0.000220829	0.000223911	0.000228323	0.000228992	0.000237399	0.00023556	0.000231502
		196547500	0.000208674	0.000217789	0.00022785	0.000250641	0.000229494	0.000228347	0.000228775	0.000227858	0.000232669	0.000231687	0.00023919	0.000246703	0.000242006
		196550000	0.000217245	0.000225479	0.000236157	0.000261914	0.000238415	0.000235244	0.000241686	0.000243194	0.000250512	0.000251295	0.000239751	0.000261479	0.000255489
		196552500	0.000224986	0.000233671	0.000247657	0.00027254	0.000249966	0.000247746	0.000245996	0.000248304	0.000252147	0.000254824	0.000261584	0.000263226	0.00026263
		196555000	0.000232271	0.000242981	0.000256476	0.000284066	0.000261594	0.000258971	0.000256437	0.000261737	0.000271381	0.000268069	0.000266905	0.000277989	0.000278103
		196557500	0.000241373	0.000252895	0.000266206	0.000297146	0.000273819	0.000269719	0.000273018	0.000276451	0.000277129	0.000294366	0.00027997	0.000282319	0.000285783
		196560000	0.000251319	0.000262314	0.000276355	0.000309109	0.000287492	0.000280997	0.000280411	0.000283814	0.000291025	0.000294978	0.000309628	0.00030655	0.000311608
		196562500	0.000261041	0.000272519	0.000288529	0.000323142	0.000302614	0.000295277	0.000298542	0.000303273	0.000304024	0.000311073	0.000313447	0.000314953	0.000293309
		196565000	0.000272646	0.00028447	0.000301824	0.000335043	0.000321467	0.000310363	0.000311423	0.000319517	0.0003254	0.000323789	0.000329658	0.000324177	0.000326252
		196567500	0.000282888	0.000295251	0.000312135	0.000339739	0.000339804	0.000327207	0.000324454	0.000330783	0.000335936	0.000334548	0.000335324	0.000343973	0.000355898
		196570000	0.000293722	0.000307056	0.000323279	0.000353806	0.00037743	0.000337249	0.000339737	0.000345076	0.000358863	0.000354643	0.000349599	0.000349573	0.000363837
		196572500	0.000305136	0.000319481	0.000335823	0.000358617	0.00039608	0.000357706	0.000360837	0.000364402	0.000370966	0.000361645	0.00037938	0.000378929	0.000383838
		196575000	0.000316236	0.000331532	0.000349196	0.000372764	0.000419188	0.000372907	0.000379597	0.0003814	0.000386654	0.0003887	0.000393173	0.000379895	0.000405133
		196577500	0.000328131	0.000346924	0.000365533	0.000390366	0.000439153	0.000395763	0.000395182	0.000404053	0.000410723	0.000412229	0.000415008	0.000411937	0.000405118
		196580000	0.000340937	0.000360981	0.00037875	0.000406534	0.000458284	0.000413378	0.000413661	0.000424339	0.000429413	0.000435443	0.00043949	0.000446509	0.000451356
		196582500	0.000352997	0.000375765	0.000393807	0.000422163	0.000481332	0.000437905	0.000435949	0.000442969	0.000455817	0.000459331	0.000453414	0.000463692	0.000467184
		196585000	0.000368427	0.000389899	0.00041089	0.00044214	0.000506491	0.000466937	0.000457793	0.000467646	0.000475691	0.000479018	0.000471433	0.000479286	0.000499072
		196587500	0.000382834	0.000407124	0.000427775	0.000457518	0.000529679	0.000495992	0.000486361	0.000493141	0.000502286	0.000505485	0.00051427	0.000522857	0.000522612
		196590000	0.000398677	0.000422568	0.000444989	0.000474381	0.000534623	0.000535848	0.00050737	0.000521054	0.000528285	0.000532682	0.000544143	0.000550742	0.000551964
		196592500	0.000414303	0.000439829	0.000463588	0.000494665	0.000554515	0.000604653	0.000542697	0.000556443	0.000559472	0.000563913	0.000563063	0.000582197	0.00057374
		196595000	0.000431722	0.000458403	0.000482765	0.000514566	0.000562787	0.000641969	0.000578929	0.000576192	0.000590931	0.000604079	0.000612831	0.000610359	0.000624064
		196597500	0.00044863	0.000474737	0.000503923	0.000536565	0.000588502	0.000677606	0.000602846	0.000616459	0.000630268	0.000631802	0.000633153	0.000641496	0.000650389
		196600000	0.000465152	0.000490611	0.000524475	0.0005598	0.00061027	0.000718112	0.000639333	0.000658428	0.000668148	0.000669781	0.000668281	0.000683024	0.000711553
		196602500	0.00048451	0.000510164	0.00054414	0.000580422	0.000637535	0.000746085	0.000686711	0.000690029	0.000711503	0.000718084	0.000732786	0.000738645	0.00074549
		196605000	0.00050335	0.00053048	0.000568341	0.000604347	0.000665937	0.000789256	0.000734729	0.000729417	0.000750616	0.000768537	0.000763308	0.000764821	0.000820858
		196607500	0.000522985	0.00055206	0.000592003	0.000629809	0.00069413	0.000825498	0.000811499	0.000781437	0.000804194	0.000802687	0.000832296	0.000830751	0.000855587
		196610000	0.000544366	0.00057319	0.000618278	0.000654778	0.000726894	0.000835628	0.000942015	0.000836084	0.000857146	0.000867202	0.000896539	0.000896456	0.000918838
		196612500	0.00056555	0.000597807	0.000644433	0.00069085	0.000759273	0.00083795	0.00100167	0.000901254	0.000916795	0.000934768	0.000952035	0.000946416	0.00100177
		196615000	0.000588317	0.000621114	0.000672187	0.000721923	0.000789082	0.000881116	0.00106835	0.000972084	0.000994849	0.00101278	0.0010212	0.00103879	0.00107181
		196617500	0.000614962	0.000648506	0.000701586	0.000751585	0.000825386	0.000928857	0.00113586	0.00105457	0.00107984	0.00110525	0.00110203	0.00115292	0.00116556
		196620000	0.000639672	0.000676506	0.000724468	0.000789972	0.00086047	0.000971525	0.00120997	0.00117179	0.00117413	0.00118932	0.00122116	0.00124506	0.00127802
		196622500	0.000669923	0.000707115	0.000758988	0.000828413	0.00090473	0.00102633	0.00127644	0.00142538	0.00127628	0.00130737	0.00132537	0.00136655	0.00141343
		196625000	0.000698379	0.000741295	0.000793361	0.000870244	0.0009541	0.0010794	0.00129291	0.00155061	0.00140818	0.0014305	0.00146491	0.00148805	0.00155603
		196627500	0.000731722	0.000774102	0.00082914	0.000911404	0.00100106	0.00113168	0.00131524	0.0016785	0.00156146	0.00158357	0.00164095	0.0016617	0.0017158
		196630000	0.000766659	0.000812275	0.000871174	0.000962177	0.00105522	0.00119358	0.00139515	0.00180022	0.00177794	0.00176303	0.00180023	0.00184197	0.00191348
		196632500	0.000817405	0.000851754	0.000917703	0.00101144	0.00111428	0.0012475	0.00147418	0.00190907	0.00210344	0.00198558	0.00203083	0.00207953	0.00215887
		196635000	0.000856399	0.000894413	0.000962767	0.00106165	0.00117127	0.00130864	0.00154941	0.00203515	0.00244608	0.00221014	0.00228924	0.00231852	0.00246319
		196637500	0.000897972	0.000938774	0.00100819	0.0011051	0.0012348	0.00138477	0.00163744	0.00209732	0.00264494	0.00249027	0.00258184	0.00266449	0.00281005
		196640000	0.000939405	0.000985038	0.00105957	0.00115533	0.00129966	0.00144776	0.00173426	0.00212179	0.00282737	0.00293095	0.00294979	0.00303755	0.00320055
		196642500	0.000981122	0.00103302	0.00110978	0.0012138	0.00137186	0.00152989	0.00180336	0.00223122	0.0029883	0.00364241	0.00335719	0.00345691	0.00368431
		196645000	0.00102758	0.00107918	0.00115852	0.00126335	0.00143204	0.00161106	0.00188023	0.00233979	0.00316756	0.00389311	0.00381644	0.00393171	0.00417119
		196647500	0.00106981	0.00112798	0.00121166	0.00131781	0.00150153	0.0016787	0.00195826	0.00244549	0.00329579	0.00410743	0.00442205	0.00450434	0.00477105
		196650000	0.00111171	0.00117431	0.00126336	0.00137616	0.00156642	0.00175623	0.00204566	0.00256073	0.00338072	0.00427417	0.00524771	0.00511365	0.00543481
		196652500	0.00115383	0.00124075	0.0013065	0.00141798	0.00162342	0.00182707	0.00211178	0.00264399	0.00351992	0.00439205	0.00576711	0.00577813	0.00600832
		196655000	0.00118909	0.0012853	0.00134832	0.00146913	0.00168315	0.0018888	0.00218492	0.0027048	0.00362674	0.00448693	0.00594154	0.0063939	0.00672111
		196657500	0.00122182	0.00131803	0.00138631	0.00150632	0.00170589	0.00193297	0.00223257	0.00277671	0.0035437	0.00453909	0.00598106	0.00701044	0.00716883
		196660000	0.00125007	0.00134822	0.00141865	0.00153816	0.00173596	0.00196933	0.00227031	0.00280058	0.00356767	0.00449545	0.00595281	0.00740401	0.00758558
		196662500	0.00127522	0.00137372	0.00144772	0.00156465	0.0017527	0.00199432	0.00229805	0.00284058	0.00357874	0.00442237	0.00592414	0.00757284	0.00778106
		196665000	0.00129255	0.00139084	0.00145893	0.00157766	0.00177011	0.00201447	0.00231464	0.00283183	0.00357425	0.0043286	0.00585325	0.00748511	0.00756523
		196667500	0.00130283	0.00140311	0.00146864	0.00158567	0.00177423	0.00201281	0.00231111	0.00281792	0.00353202	0.00416776	0.00573787	0.00721081	0.00720805
		196670000	0.00130761	0.00140161	0.00146768	0.00158204	0.0017667	0.00200228	0.00228157	0.00276179	0.0034647	0.00403932	0.005616	0.00674646	0.00675391
		196672500	0.00130423	0.00139671	0.00145759	0.00156649	0.00175179	0.00197825	0.00223809	0.00270543	0.00336451	0.00381859	0.0054022	0.00613172	0.00603022
		196675000	0.001295	0.0013823	0.00144316	0.00154478	0.0017267	0.00193655	0.00219165	0.00263224	0.00326229	0.00367209	0.00512827	0.00548843	0.00539583
		196677500	0.00128129	0.00136665	0.00141957	0.00151898	0.00169035	0.00188927	0.00212259	0.00253878	0.00278324	0.00353922	0.00473767	0.00486154	0.00476185
		196680000	0.00126053	0.00133983	0.00138984	0.00148499	0.00165109	0.0018279	0.00204617	0.0024417	0.00261009	0.00344301	0.00425655	0.00432582	0.00418518
		196682500	0.00123335	0.00130847	0.00135232	0.00143936	0.00159739	0.00177141	0.00195901	0.00233886	0.00244731	0.00332517	0.00379164	0.0038118	0.00367633
		196685000	0.00120364	0.00127105	0.00131369	0.00139388	0.00153654	0.00169162	0.00188188	0.00221955	0.00232432	0.00312991	0.00336049	0.00336528	0.00318764
		196687500	0.0011711	0.00123219	0.00126929	0.00134092	0.00146439	0.00161466	0.001804	0.00210089	0.00221127	0.00293005	0.00295776	0.00290893	0.00286389
		196690000	0.00113434	0.00119163	0.00122054	0.00128829	0.00140237	0.00153668	0.00171902	0.00175882	0.00214673	0.00263353	0.00261716	0.00260303	0.00255799
		196692500	0.00109742	0.00114722	0.00117205	0.00123518	0.00133694	0.00144617	0.00162865	0.0016256	0.00207264	0.00236406	0.00231092	0.00234757	0.00224137
		196695000	0.00105646	0.00110119	0.00112774	0.00118477	0.0012679	0.00136195	0.00154471	0.00153115	0.00195895	0.00211806	0.0020883	0.00206088	0.00199155
		196697500	0.00101726	0.0010553	0.00107696	0.00113087	0.00120575	0.00128958	0.0014534	0.00144735	0.00182016	0.00188927	0.00186146	0.00187483	0.001803
		196700000	0.000976616	0.00101236	0.00103217	0.00108391	0.00114528	0.00121579	0.00136073	0.0013737	0.0017071	0.00171444	0.00169521	0.00166631	0.00165459
		196702500	0.000941237	0.000970758	0.000986368	0.00103835	0.00108014	0.00116068	0.00128841	0.00133359	0.00156428	0.00156218	0.00153654	0.00151762	0.00144436
		196705000	0.00090304	0.000927823	0.000944839	0.000988223	0.00102906	0.00110245	0.00107855	0.00130123	0.00143587	0.00140264	0.00139653	0.00139108	0.00133304
		196707500	0.000865777	0.000888849	0.000902874	0.000939617	0.000972371	0.00104565	0.00101713	0.00125025	0.00129388	0.00129062	0.00125327	0.00124559	0.00121864
		196710000	0.000831909	0.000851338	0.000861688	0.000889889	0.000917794	0.000990944	0.000955934	0.00118101	0.00119493	0.00118551	0.00117691	0.00115618	0.00114617
		196712500	0.000799983	0.0008051	0.000825285	0.000851289	0.000869943	0.000939812	0.000912809	0.00110583	0.00109127	0.00109775	0.00107355	0.00107068	0.0010376
		196715000	0.000767104	0.000771053	0.000790211	0.000809388	0.000823897	0.000886801	0.000877124	0.00104854	0.00102108	0.00101078	0.00100125	0.000992042	0.000978041
		196717500	0.000737284	0.000738032	0.000758366	0.000769818	0.000783868	0.000840299	0.000856639	0.000966414	0.00095055	0.000943479	0.000914787	0.000914962	0.000911862
		196720000	0.000707737	0.000709285	0.000727451	0.00073655	0.000753189	0.000714028	0.000838927	0.000905476	0.000891042	0.000888614	0.000867188	0.000855999	0.000830778
		196722500	0.000679435	0.00068	0.000698673	0.000702606	0.000718075	0.000683841	0.000810916	0.000844277	0.000836259	0.000820733	0.000800704	0.000801252	0.000782083
		196725000	0.000650488	0.000653568	0.000664726	0.000670405	0.00068293	0.00064807	0.000775593	0.000790864	0.000770829	0.000759224	0.000766851	0.000754764	0.000711051
		196727500	0.000624409	0.000626174	0.000632687	0.000637851	0.000649438	0.000618123	0.000737508	0.000747408	0.000729221	0.000712966	0.00070243	0.00071034	0.000710155
		196730000	0.000597609	0.000596541	0.000604779	0.000602629	0.000617223	0.00059424	0.000696436	0.000695859	0.000681301	0.000672761	0.000654683	0.000657003	0.000662811
		196732500	0.00057285	0.000572474	0.000575368	0.000574553	0.000590443	0.000578509	0.000660341	0.000644839	0.000645329	0.000629454	0.000626728	0.00062965	0.000626123
		196735000	0.000545308	0.000549394	0.000549595	0.00054647	0.000515123	0.000560805	0.000626924	0.000611494	0.000606453	0.000591649	0.000581862	0.000576461	0.000569405
		196737500	0.000521259	0.000522978	0.000527187	0.000523121	0.000486973	0.000552123	0.000590232	0.000576561	0.000568425	0.0005686	0.000566695	0.000554635	0.000553105
		196740000	0.000499949	0.000498697	0.000500692	0.000498271	0.00046995	0.000534671	0.000555714	0.0005478	0.000538107	0.00052337	0.000507676	0.000512913	0.000488614
		196742500	0.000477523	0.000480077	0.000478966	0.000475447	0.00044493	0.000512583	0.000525555	0.000517237	0.000511564	0.000509161	0.000487961	0.000476957	0.000480631
		196745000	0.000457809	0.000457774	0.000457103	0.000453844	0.00043105	0.000492095	0.000498982	0.000494085	0.000489491	0.00048293	0.000466397	0.000476246	0.000447754
		196747500	0.000436871	0.000436768	0.000434681	0.000433099	0.000413916	0.000465682	0.000471553	0.00046593	0.00045639	0.000463549	0.000453925	0.000446089	0.000446923
		196750000	0.000417929	0.000416458	0.00041425	0.00041781	0.000398841	0.000449916	0.000447144	0.000443499	0.000440318	0.000428229	0.000428347	0.000434391	0.000436932
		196752500	0.000401911	0.000399288	0.000394228	0.000389364	0.000391047	0.000426347	0.000427263	0.000419661	0.000413202	0.000416191	0.000400122	0.000413374	0.000404717
		196755000	0.000384776	0.000381993	0.000378234	0.000354389	0.000382694	0.000404657	0.000411279	0.000396874	0.000396176	0.000399952	0.000392721	0.000376291	0.000380709
		196757500	0.000370275	0.000366604	0.000365319	0.000338788	0.000371801	0.000389608	0.00038852	0.000384793	0.000374947	0.000365655	0.000373449	0.000362592	0.000381251
		196760000	0.000355256	0.000352317	0.000349862	0.000327537	0.00035976	0.000371123	0.000368995	0.000361288	0.000361827	0.000360322	0.000358127	0.000356942	0.00035757
		196762500	0.000341749	0.000338046	0.00033676	0.000316389	0.000348446	0.000357163	0.000358007	0.000346574	0.000347505	0.000339574	0.000349704	0.000333991	0.000350527
		196765000	0.000330293	0.000326489	0.000323259	0.000305572	0.000335807	0.000342635	0.000342365	0.00033714	0.000334504	0.000330159	0.000330843	0.00033104	0.000337586
		196767500	0.000315952	0.000312217	0.000311448	0.000296413	0.000323154	0.000324742	0.00033023	0.00032776	0.000320529	0.00032112	0.000310795	0.000308806	0.000319921
		196770000	0.000304809	0.000300853	0.000300234	0.000287789	0.000314151	0.00031274	0.000310408	0.000311998	0.000311401	0.000309792	0.000310634	0.000311717	0.000298237
		196772500	0.000293258	0.000288798	0.000288898	0.000283816	0.000300137	0.000305054	0.000305977	0.000298942	0.000294723	0.000289235	0.000293341	0.000283598	0.000291531
		196775000	0.000283704	0.00027809	0.000264882	0.000276841	0.000289139	0.000289671	0.000293101	0.0002906	0.00028577	0.000278607	0.00028011	0.000279209	0.00027643
		196777500	0.000271869	0.000268144	0.000255086	0.000272048	0.000281109	0.000281092	0.000280864	0.000280129	0.00027316	0.00027191	0.000268042	0.00026566	0.000268004
		196780000	0.00026195	0.000261031	0.000247256	0.000264792	0.000269574	0.000270487	0.000269963	0.000262393	0.000266317	0.000257004	0.000257979	0.000266109	0.000267282
		196782500	0.000253364	0.000250689	0.000239466	0.000255531	0.000259527	0.000261177	0.000260461	0.00025729	0.00025899	0.000253028	0.000254286	0.000252152	0.000246242
		196785000	0.000244277	0.000242314	0.00023117	0.000249326	0.000249132	0.000250842	0.000253532	0.000248794	0.0002443	0.000242093	0.000251505	0.000235682	0.000247527
		196787500	0.000235564	0.000232806	0.000224185	0.000238689	0.000240731	0.000240513	0.000240391	0.000242358	0.000235298	0.000232251	0.000233362	0.000232332	0.000232813
		196790000	0.000226729	0.000224949	0.000217137	0.00023177	0.000231857	0.000234908	0.00023369	0.000231545	0.00023179	0.000222383	0.000223521	0.000223389	0.000229921
		196792500	0.000218382	0.000217268	0.000210108	0.000222715	0.000224355	0.000226434	0.000227454	0.000217521	0.000219117	0.000218161	0.000218792	0.000227148	0.000226418
		196795000	0.000210055	0.000209066	0.00020522	0.000217656	0.000216023	0.000219928	0.000217398	0.000216302	0.000209844	0.000212682	0.000210162	0.00020507	0.000219344
		196797500	0.000203286	0.000200353	0.000199688	0.000210502	0.000207856	0.000208878	0.00020824	0.0002082	0.000202977	0.000205522	0.000202717	0.000206055	0.000205694
		196800000	0.000195478	0.000186966	0.00019613	0.000201597	0.000201164	0.000201982	0.000202572	0.000201283	0.000197776	0.000195261	0.00020019	0.000193835	0.000195496
		196802500	0.000188702	0.000180671	0.000189613	0.000193345	0.000193913	0.000196748	0.000195268	0.000189749	0.000193617	0.000188269	0.000186198	0.000185744	0.000189892
		196805000	0.000181438	0.000173685	0.000183264	0.000186625	0.000185774	0.000187969	0.000189697	0.000187415	0.000176504	0.000183478	0.000175353	0.000181862	0.000179501
		196807500	0.000175378	0.000168164	0.000178363	0.000180009	0.000178337	0.000182751	0.000179852	0.000176828	0.00017445	0.000180054	0.00017129	0.00016982	0.000169161
		196810000	0.000169753	0.000162737	0.000173131	0.000172089	0.000171898	0.000173248	0.000174176	0.000172925	0.000171555	0.000169033	0.000176617	0.000166978	0.000159842
		196812500	0.000162953	0.000156677	0.000167061	0.000167048	0.000164631	0.000168002	0.00016608	0.000165448	0.000164512	0.000160664	0.000161674	0.000159955	0.000157179
		196815000	0.000156697	0.00015203	0.000160373	0.000161107	0.000161485	0.00016298	0.000161406	0.000159731	0.000162054	0.000158475	0.000166129	0.000155097	0.000145618
		196817500	0.000151339	0.00014664	0.000155443	0.000154944	0.000155735	0.000155884	0.000158493	0.000153253	0.000153624	0.000148176	0.00015173	0.000140197	0.000151548
		196820000	0.000145975	0.000141698	0.000150329	0.000149974	0.000149238	0.000150193	0.000148699	0.000146537	0.000148441	0.00014424	0.00014528	0.000145646	0.000152425
		196822500	0.000141379	0.000138372	0.000144585	0.00014402	0.000143752	0.000144485	0.000145872	0.000143217	0.000143701	0.00013962	0.000136709	0.000137175	0.000134791
		196825000	0.000136775	0.000134416	0.000140968	0.000139869	0.000139583	0.000139472	0.0001411	0.000137662	0.000131324	0.000135687	0.000140742	0.00012996	0.000142426
		196827500	0.000132498	0.000130606	0.000135174	0.000134724	0.000133396	0.000136513	0.000135202	0.000136272	0.000133992	0.000133946	0.000134163	0.000126351	0.000137484
		196830000	0.00012647	0.000127693	0.000130971	0.00013234	0.000131408	0.000131956	0.000130867	0.000127696	0.000129027	0.000124831	0.00012849	0.000121116	0.000116663
		196832500	0.000120427	0.000124084	0.000126761	0.000126632	0.000125978	0.000127957	0.00012568	0.000125991	0.000124588	0.000123708	0.000124894	0.000125716	0.000112593
		196835000	0.000116947	0.000120933	0.000123293	0.000122371	0.000121127	0.0001236	0.000122091	0.000123562	0.000119643	0.000115091	0.000116732	0.000120877	0.000123354
		196837500	0.000113387	0.000117598	0.000119729	0.000118388	0.00011874	0.000118956	0.000118192	0.000121236	0.000122637	0.000122906	0.000110161	0.000113802	0.000111919
		196840000	0.000110192	0.000115168	0.000115361	0.000115697	0.000115838	0.000116559	0.000115591	0.000116451	0.000114054	0.000113084	0.000113349	0.000114475	0.000109816
		196842500	0.000106869	0.000111593	0.000112625	0.000111956	0.000113205	0.000112906	0.000111367	0.000109516	0.00011317	0.000107401	0.000107361	0.000111114	0.000106196
		196845000	0.000104382	0.000107643	0.000109079	0.000108913	0.000107804	0.000109488	0.000108249	0.000108942	0.000104184	0.000108101	0.000105017	0.000107019	0.000109978
		196847500	0.000101208	0.00010629	0.000106421	0.000106094	0.000107198	0.000104631	0.000108164	0.000103774	0.00010516	0.000100683	0.00010309	0.00010439	9.97932e-05
		196850000	9.88075e-05	0.000103538	0.000104066	0.000103999	0.00010427	0.000103804	0.00010544	0.000104109	9.76684e-05	9.82605e-05	9.72877e-05	9.77994e-05	9.12068e-05
		196852500	9.61597e-05	0.00010034	0.000101372	0.000101616	0.000100757	0.000102129	9.9326e-05	0.000100928	9.77073e-05	9.9313e-05	9.4e-05	9.10435e-05	9.50357e-05
		196855000	9.33987e-05	9.87673e-05	9.87361e-05	9.81499e-05	9.88191e-05	9.87363e-05	9.79535e-05	9.76981e-05	9.68534e-05	9.22119e-05	9.25075e-05	9.81936e-05	9.95027e-05
		196857500	9.10022e-05	9.47397e-05	9.63226e-05	9.55146e-05	9.58515e-05	9.77888e-05	9.63179e-05	9.59829e-05	9.39146e-05	9.16322e-05	8.81883e-05	9.29238e-05	9.48019e-05
		196860000	8.84824e-05	9.32646e-05	9.30889e-05	9.26501e-05	9.34992e-05	9.14284e-05	9.37417e-05	8.98878e-05	9.02219e-05	8.99158e-05	8.91376e-05	8.51795e-05	8.62563e-05
		196862500	8.60169e-05	9.01849e-05	9.01521e-05	9.03516e-05	8.95625e-05	9.03845e-05	8.93538e-05	8.9228e-05	9.1054e-05	8.71469e-05	8.78337e-05	8.41947e-05	8.04289e-05
		196865000	8.37562e-05	8.7849e-05	8.85277e-05	8.62718e-05	8.6838e-05	8.69771e-05	8.7881e-05	8.90707e-05	8.58499e-05	8.78972e-05	8.35588e-05	8.53994e-05	8.64703e-05
		196867500	8.16915e-05	8.53981e-05	8.58335e-05	8.59269e-05	8.49894e-05	8.65388e-05	8.54065e-05	8.24789e-05	8.26502e-05	8.34029e-05	8.03184e-05	8.23397e-05	7.73893e-05
		196870000	7.93334e-05	8.31609e-05	8.30417e-05	8.41401e-05	8.41137e-05	8.3767e-05	8.36329e-05	8.22841e-05	7.88599e-05	8.03038e-05	7.97025e-05	7.38061e-05	7.57736e-05
		196872500	7.68849e-05	8.04683e-05	8.04539e-05	8.05314e-05	7.90386e-05	8.07858e-05	7.91085e-05	7.83359e-05	7.90999e-05	7.74423e-05	7.78076e-05	7.50862e-05	7.32877e-05
		196875000	7.5045e-05	7.81423e-05	7.76471e-05	7.9528e-05	7.88268e-05	7.85295e-05	7.72916e-05	7.6695e-05	7.28905e-05	7.48359e-05	7.1713e-05	8.2572e-05	7.34024e-05
		196877500	7.23731e-05	7.5856e-05	7.60987e-05	7.55894e-05	7.59318e-05	7.80306e-05	7.52161e-05	7.17091e-05	7.41401e-05	7.23331e-05	7.23254e-05	6.66135e-05	7.78366e-05
		196880000	6.98488e-05	7.32258e-05	7.33257e-05	7.32325e-05	7.27148e-05	7.49275e-05	7.26576e-05	7.36399e-05	7.0079e-05	6.74554e-05	6.55922e-05	6.76052e-05	7.13011e-05
		196882500	6.76997e-05	7.12981e-05	7.18552e-05	7.10284e-05	7.08936e-05	7.01026e-05	7.03853e-05	7.07144e-05	6.80943e-05	6.8776e-05	6.66959e-05	6.58358e-05	6.58646e-05
		196885000	6.65888e-05	6.98522e-05	6.95191e-05	6.92325e-05	6.86322e-05	6.92156e-05	6.95746e-05	6.6755e-05	6.61678e-05	6.41041e-05	6.63448e-05	6.75209e-05	6.29824e-05
		196887500	6.41777e-05	6.70713e-05	6.69897e-05	6.65154e-05	6.64007e-05	6.78453e-05	6.74854e-05	6.72456e-05	6.48585e-05	6.13988e-05	6.52956e-05	6.35492e-05	6.49593e-05
		196890000	6.31299e-05	6.48207e-05	6.56219e-05	6.44447e-05	6.50925e-05	6.44344e-05	6.39808e-05	6.35609e-05	6.11153e-05	6.22623e-05	6.30559e-05	6.54595e-05	6.71611e-05
		196892500	6.11212e-05	6.39953e-05	6.36863e-05	6.30744e-05	6.37307e-05	6.43184e-05	6.42479e-05	6.31585e-05	5.98465e-05	6.18009e-05	5.69629e-05	5.77243e-05	5.50054e-05
		196895000	5.94391e-05	6.19119e-05	6.22216e-05	6.17977e-05	6.17399e-05	6.19838e-05	6.15078e-05	6.02012e-05	6.10107e-05	5.85252e-05	5.87326e-05	5.31178e-05	5.54874e-05
		196897500	5.79645e-05	6.00146e-05	6.00043e-05	6.02528e-05	6.04622e-05	5.92255e-05	6.04931e-05	5.89513e-05	5.62744e-05	5.69785e-05	5.71031e-05	5.78582e-05	5.78133e-05
		196900000	5.68799e-05	5.87066e-05	5.87798e-05	5.81712e-05	5.87516e-05	5.84358e-05	5.71687e-05	5.82196e-05	5.81175e-05	5.54187e-05	5.73831e-05	5.69298e-05	5.34664e-05
		196902500	5.57978e-05	5.73643e-05	5.65541e-05	5.68715e-05	5.6418e-05	5.68134e-05	5.74362e-05	5.78159e-05	5.52435e-05	5.54907e-05	5.41653e-05	5.3384e-05	5.43268e-05
		196905000	5.41279e-05	5.56141e-05	5.55371e-05	5.49835e-05	5.57562e-05	5.57036e-05	5.41282e-05	5.47606e-05	5.41277e-05	5.34737e-05	5.23168e-05	5.13311e-05	5.12355e-05
		196907500	5.30388e-05	5.37144e-05	5.43123e-05	5.45638e-05	5.37696e-05	5.38426e-05	5.25583e-05	5.24996e-05	5.49368e-05	5.16671e-05	5.25542e-05	4.6976e-05	4.86317e-05
		196910000	5.15859e-05	5.25426e-05	5.29036e-05	5.34904e-05	5.26401e-05	5.34607e-05	5.37295e-05	5.09804e-05	5.03344e-05	5.23126e-05	4.87883e-05	5.04573e-05	5.10734e-05
		196912500	5.06386e-05	5.12553e-05	5.12143e-05	5.12962e-05	5.09316e-05	5.12357e-05	4.98441e-05	5.20214e-05	4.91854e-05	4.76007e-05	4.77871e-05	5.18469e-05	5.09878e-05
		196915000	4.93257e-05	4.99647e-05	4.99182e-05	5.08938e-05	5.0325e-05	5.09911e-05	4.96384e-05	4.91179e-05	5.10721e-05	4.95459e-05	5.05216e-05	4.48799e-05	4.51873e-05
		196917500	4.79794e-05	4.84957e-05	4.86211e-05	4.85062e-05	4.83182e-05	4.87489e-05	4.95054e-05	4.83947e-05	4.5293e-05	4.72954e-05	5.01665e-05	4.8964e-05	4.78454e-05
		196920000	4.71617e-05	4.73074e-05	4.72045e-05	4.72587e-05	4.77323e-05	4.77802e-05	4.7497e-05	4.59377e-05	4.59945e-05	4.49513e-05	4.28241e-05	4.37718e-05	4.21488e-05
		196922500	4.56435e-05	4.55466e-05	4.61678e-05	4.62085e-05	4.50364e-05	4.57291e-05	4.73936e-05	4.66989e-05	4.56506e-05	4.4256e-05	4.40731e-05	4.47227e-05	3.84455e-05
		196925000	4.47161e-05	4.49668e-05	4.46751e-05	4.49464e-05	4.41084e-05	4.55974e-05	4.34169e-05	4.50762e-05	4.34773e-05	4.19419e-05	4.44781e-05	4.33543e-05	4.19643e-05
		196927500	4.33151e-05	4.33318e-05	4.29682e-05	4.24161e-05	4.32528e-05	4.3453e-05	4.32923e-05	4.42229e-05	4.15716e-05	4.2784e-05	4.16584e-05	4.25261e-05	3.87905e-05
		196930000	4.19067e-05	4.19336e-05	4.16506e-05	4.24787e-05	4.22563e-05	4.30514e-05	4.30071e-05	3.98436e-05	4.12063e-05	4.16366e-05	3.89293e-05	3.95695e-05	3.91306e-05
		196932500	4.09059e-05	4.03136e-05	4.05694e-05	4.11185e-05	4.12492e-05	4.09573e-05	4.09243e-05	3.9964e-05	4.00223e-05	3.90762e-05	4.0177e-05	3.80615e-05	3.60077e-05
		196935000	3.94072e-05	3.87524e-05	3.90238e-05	3.92345e-05	3.91699e-05	3.94457e-05	3.99697e-05	3.874e-05	3.81323e-05	3.76549e-05	3.85472e-05	4.09833e-05	3.24047e-05
		196937500	3.78024e-05	3.7694e-05	3.75896e-05	3.7902e-05	3.87036e-05	3.70698e-05	3.79902e-05	3.92497e-05	3.82837e-05	3.76791e-05	3.27149e-05	3.27452e-05	3.39941e-05
		196940000	3.62888e-05	3.61356e-05	3.64374e-05	3.65507e-05	3.56977e-05	3.74271e-05	3.7493e-05	3.58177e-05	3.40353e-05	3.39412e-05	3.42512e-05	3.18758e-05	3.38013e-05
		196942500	3.46996e-05	3.50099e-05	3.45946e-05	3.47565e-05	3.46511e-05	3.53248e-05	3.49832e-05	3.45034e-05	3.2497e-05	3.33211e-05	3.37136e-05	3.35909e-05	3.04794e-05
		196945000	3.33863e-05	3.33778e-05	3.31232e-05	3.38729e-05	3.4081e-05	3.37878e-05	3.27818e-05	3.12328e-05	3.27985e-05	3.27881e-05	3.134e-05	3.26648e-05	3.08212e-05
		196947500	3.192e-05	3.15799e-05	3.13771e-05	3.24162e-05	3.20442e-05	3.21473e-05	3.18273e-05	3.19151e-05	3.10122e-05	3.1545e-05	2.93875e-05	2.85221e-05	2.706e-05
		196950000	3.04011e-05	2.98764e-05	3.00209e-05	3.01392e-05	2.98016e-05	3.04406e-05	3.07659e-05	2.88975e-05	3.04538e-05	3.12651e-05	2.85661e-05	2.42847e-05	2.62832e-05
		196952500	2.86221e-05	2.8208e-05	2.82625e-05	2.89803e-05	2.91328e-05	2.81023e-05	2.87531e-05	2.84529e-05	2.54464e-05	2.60274e-05	2.52767e-05	2.5084e-05	2.7555e-05
		196955000	2.74929e-05	2.69105e-05	2.69393e-05	2.74975e-05	2.71765e-05	2.6949e-05	2.72152e-05	2.61907e-05	2.6164e-05	2.71329e-05	2.76836e-05	2.86139e-05	2.39988e-05
		196957500	2.58683e-05	2.51759e-05	2.58346e-05	2.60816e-05	2.59205e-05	2.60711e-05	2.58937e-05	2.5355e-05	2.52719e-05	2.32941e-05	2.50395e-05	2.57985e-05	2.83734e-05
		196960000	2.43119e-05	2.41312e-05	2.40163e-05	2.44051e-05	2.42807e-05	2.47573e-05	2.46488e-05	2.32106e-05	2.29508e-05	2.31146e-05	2.54819e-05	2.48202e-05	2.28686e-05
		196962500	2.32683e-05	2.25365e-05	2.31239e-05	2.36149e-05	2.30001e-05	2.30033e-05	2.29934e-05	2.32542e-05	2.1257e-05	2.2198e-05	2.01873e-05	2.37055e-05	2.32383e-05
		196965000	2.21296e-05	2.16705e-05	2.1881e-05	2.18969e-05	2.15979e-05	2.15935e-05	2.16663e-05	2.12834e-05	2.21173e-05	2.17776e-05	2.03831e-05	1.98228e-05	2.08822e-05
		196967500	2.08506e-05	2.02792e-05	2.04197e-05	2.06603e-05	2.03885e-05	2.05492e-05	2.11094e-05	2.07074e-05	2.10933e-05	1.88047e-05	1.92198e-05	1.86297e-05	1.81782e-05
		196970000	1.96396e-05	1.91265e-05	1.94045e-05	1.95242e-05	1.94859e-05	1.93083e-05	2.04451e-05	1.93278e-05	1.88537e-05	1.71734e-05	1.66368e-05	2.06603e-05	1.67885e-05
		196972500	1.86925e-05	1.80362e-05	1.82733e-05	1.85036e-05	1.81515e-05	1.85214e-05	1.83057e-05	1.75458e-05	1.69766e-05	1.72761e-05	1.62144e-05	1.5457e-05	1.28926e-05
		196975000	1.75398e-05	1.74031e-05	1.71863e-05	1.78125e-05	1.7174e-05	1.78626e-05	1.8307e-05	1.895e-05	1.66343e-05	1.56903e-05	1.66722e-05	1.76727e-05	1.63928e-05
		196977500	1.66904e-05	1.64006e-05	1.6241e-05	1.66748e-05	1.68462e-05	1.67082e-05	1.64525e-05	1.61351e-05	1.56965e-05	1.48105e-05	1.75223e-05	1.77856e-05	1.39636e-05
		196980000	1.56108e-05	1.56899e-05	1.53145e-05	1.6068e-05	1.54345e-05	1.55395e-05	1.47475e-05	1.6218e-05	1.37987e-05	1.69175e-05	1.53409e-05	1.49573e-05	1.37332e-05
		196982500	1.47314e-05	1.47291e-05	1.45442e-05	1.48576e-05	1.46165e-05	1.54176e-05	1.5238e-05	1.51255e-05	1.49641e-05	1.23352e-05	1.35197e-05	1.56942e-05	1.33105e-05
		196985000	1.42298e-05	1.39293e-05	1.37084e-05	1.44122e-05	1.44572e-05	1.39993e-05	1.39747e-05	1.34718e-05	1.33438e-05	1.35333e-05	1.46075e-05	1.45588e-05	1.13561e-05
		196987500	1.34118e-05	1.32825e-05	1.34654e-05	1.34128e-05	1.39207e-05	1.37197e-05	1.33976e-05	1.36989e-05	1.28591e-05	1.29799e-05	1.35857e-05	1.36974e-05	1.13284e-05
		196990000	1.31358e-05	1.29557e-05	1.31839e-05	1.3403e-05	1.31112e-05	1.31017e-05	1.32441e-05	1.28819e-05	1.20393e-05	1.25682e-05	1.21078e-05	1.42141e-05	1.10095e-05
		196992500	1.27244e-05	1.24887e-05	1.27064e-05	1.29461e-05	1.25507e-05	1.25367e-05	1.33738e-05	1.27997e-05	1.27064e-05	1.4389e-05	1.20944e-05	1.38988e-05	1.14606e-05
		196995000	1.24924e-05	1.22885e-05	1.23914e-05	1.24297e-05	1.25737e-05	1.28229e-05	1.27724e-05	1.14705e-05	1.27261e-05	1.1663e-05	1.21975e-05	1.14597e-05	1.30565e-05
		196997500	1.24211e-05	1.23463e-05	1.2292e-05	1.22108e-05	1.23466e-05	1.1876e-05	1.23839e-05	1.3022e-05	1.30491e-05	1.24221e-05	9.47236e-06	1.23138e-05	1.47804e-05
		197000000	1.26921e-05	1.22962e-05	1.22493e-05	1.26201e-05	1.23434e-05	1.22728e-05	1.25205e-05	1.29357e-05	1.33654e-05	1.22248e-05	1.16836e-05	1.30514e-05	1.66139e-05
		197002500	1.27538e-05	1.26853e-05	1.24885e-05	1.31416e-05	1.28336e-05	1.26152e-05	1.3243e-05	1.28617e-05	1.3946e-05	1.33853e-05	1.2889e-05	1.12575e-05	1.50589e-05
		197005000	1.32235e-05	1.27511e-05	1.26707e-05	1.34169e-05	1.35784e-05	1.3119e-05	1.31913e-05	1.2938e-05	1.33341e-05	1.24384e-05	1.49119e-05	1.44175e-05	1.74419e-05
		197007500	1.33565e-05	1.3169e-05	1.33724e-05	1.3512e-05	1.38396e-05	1.34269e-05	1.35588e-05	1.41015e-05	1.46775e-05	1.38011e-05	1.59522e-05	1.45232e-05	1.68197e-05
		197010000	1.40035e-05	1.36427e-05	1.38705e-05	1.38409e-05	1.45424e-05	1.40637e-05	1.39308e-05	1.39194e-05	1.31642e-05	1.45928e-05	1.51188e-05	1.21857e-05	2.0054e-05
		197012500	1.43496e-05	1.41407e-05	1.42557e-05	1.41654e-05	1.44288e-05	1.38838e-05	1.46901e-05	1.58859e-05	1.49987e-05	1.4489e-05	1.55653e-05	1.46054e-05	1.64526e-05
		197015000	1.51e-05	1.46925e-05	1.45446e-05	1.50386e-05	1.48995e-05	1.46885e-05	1.51503e-05	1.53568e-05	1.60878e-05	1.45189e-05	1.2364e-05	1.61771e-05	1.54106e-05
		197017500	1.52387e-05	1.49164e-05	1.53294e-05	1.53636e-05	1.5428e-05	1.47576e-05	1.52235e-05	1.61973e-05	1.60732e-05	1.50103e-05	1.59515e-05	1.6778e-05	1.5831e-05
		197020000	1.58189e-05	1.54396e-05	1.59543e-05	1.63197e-05	1.58207e-05	1.54305e-05	1.62726e-05	1.61751e-05	1.59152e-05	1.63281e-05	1.62927e-05	1.49889e-05	1.73013e-05
		197022500	1.64877e-05	1.63609e-05	1.63642e-05	1.66595e-05	1.65086e-05	1.65089e-05	1.66447e-05	1.72659e-05	1.73591e-05	1.69277e-05	1.68908e-05	1.69575e-05	1.60048e-05
		197025000	1.69964e-05	1.70541e-05	1.66981e-05	1.69066e-05	1.68464e-05	1.65228e-05	1.71897e-05	1.72733e-05	1.78841e-05	1.74218e-05	1.83987e-05	1.73947e-05	1.8173e-05
		197027500	1.76229e-05	1.73277e-05	1.75798e-05	1.75048e-05	1.7502e-05	1.78172e-05	1.74422e-05	1.77274e-05	1.79357e-05	1.64928e-05	1.90389e-05	1.99755e-05	1.98138e-05
		197030000	1.82428e-05	1.79501e-05	1.83325e-05	1.80181e-05	1.81104e-05	1.85331e-05	1.79827e-05	1.76593e-05	1.92581e-05	1.8284e-05	1.85275e-05	1.79618e-05	1.87209e-05
		197032500	1.90498e-05	1.84153e-05	1.83751e-05	1.85888e-05	1.83934e-05	1.9588e-05	1.88479e-05	1.81663e-05	1.88392e-05	2.09652e-05	1.90802e-05	2.24268e-05	2.03601e-05
		197035000	1.96549e-05	1.91997e-05	1.93962e-05	1.959e-05	1.92725e-05	1.96967e-05	1.91947e-05	1.89784e-05	2.04205e-05	2.06529e-05	2.05116e-05	2.23154e-05	2.04163e-05
		197037500	2.02816e-05	1.96186e-05	2.01773e-05	2.01637e-05	1.98742e-05	2.06863e-05	2.04175e-05	1.98381e-05	2.23388e-05	2.23689e-05	2.1684e-05	1.93272e-05	1.87938e-05
		197040000	2.07924e-05	2.08345e-05	2.05779e-05	2.10489e-05	2.11666e-05	2.04453e-05	2.10931e-05	2.11369e-05	2.10159e-05	2.20715e-05	2.33985e-05	2.29614e-05	2.30555e-05
		197042500	2.1559e-05	2.14293e-05	2.1696e-05	2.16002e-05	2.14464e-05	2.17305e-05	2.26657e-05	2.16877e-05	2.15739e-05	2.18986e-05	2.10323e-05	2.42084e-05	2.3018e-05
		197045000	2.23481e-05	2.17517e-05	2.18708e-05	2.2534e-05	2.2135e-05	2.19604e-05	2.23554e-05	2.32769e-05	2.29305e-05	2.22055e-05	2.05779e-05	2.36784e-05	2.58255e-05
		197047500	2.31713e-05	2.29975e-05	2.3008e-05	2.33285e-05	2.33003e-05	2.30753e-05	2.21447e-05	2.38117e-05	2.23873e-05	2.43168e-05	2.20872e-05	2.09397e-05	2.2409e-05
		197050000	2.38492e-05	2.35817e-05	2.34055e-05	2.36966e-05	2.35095e-05	2.30491e-05	2.32316e-05	2.47376e-05	2.35089e-05	2.59815e-05	2.4293e-05	2.30448e-05	3.04838e-05
		197052500	2.4211e-05	2.38522e-05	2.42214e-05	2.40759e-05	2.4072e-05	2.47192e-05	2.43596e-05	2.38808e-05	2.43624e-05	2.37311e-05	2.65995e-05	2.67516e-05	2.60407e-05
		197055000	2.52551e-05	2.46971e-05	2.47297e-05	2.53386e-05	2.48106e-05	2.55185e-05	2.53323e-05	2.36488e-05	2.5905e-05	2.57649e-05	2.53633e-05	2.444e-05	2.36821e-05
		197057500	2.59756e-05	2.54293e-05	2.57619e-05	2.53896e-05	2.59022e-05	2.61985e-05	2.50733e-05	2.56535e-05	2.5217e-05	2.35872e-05	2.51783e-05	2.57788e-05	2.88201e-05
		197060000	2.64949e-05	2.58654e-05	2.61427e-05	2.62792e-05	2.61842e-05	2.5445e-05	2.57231e-05	2.63651e-05	2.47183e-05	2.52813e-05	2.64809e-05	2.62294e-05	2.88611e-05
		197062500	2.69491e-05	2.64332e-05	2.64417e-05	2.68901e-05	2.6945e-05	2.59822e-05	2.60582e-05	2.80188e-05	2.68203e-05	2.62952e-05	2.91065e-05	2.75856e-05	2.88434e-05
		197065000	2.76399e-05	2.69828e-05	2.72843e-05	2.7826e-05	2.70803e-05	2.77211e-05	2.76078e-05	2.60795e-05	2.71057e-05	2.73787e-05	2.64936e-05	2.70706e-05	2.5848e-05
		197067500	2.76548e-05	2.71668e-05	2.74846e-05	2.77548e-05	2.74366e-05	2.71838e-05	2.70923e-05	2.6807e-05	2.68714e-05	2.72522e-05	2.94565e-05	2.72716e-05	2.95628e-05
		197070000	2.77927e-05	2.76662e-05	2.76871e-05	2.78581e-05	2.77687e-05	2.84422e-05	2.78329e-05	2.77984e-05	2.60033e-05	2.73472e-05	2.61036e-05	2.96131e-05	2.75785e-05
		197072500	2.78937e-05	2.80467e-05	2.71556e-05	2.77239e-05	2.79975e-05	2.77419e-05	2.89332e-05	2.7999e-05	2.72403e-05	2.66575e-05	2.92462e-05	2.50052e-05	3.29804e-05
		197075000	2.83568e-05	2.7416e-05	2.75193e-05	2.78341e-05	2.75002e-05	2.70138e-05	2.66081e-05	2.81936e-05	2.73817e-05	2.44587e-05	2.57367e-05	3.30935e-05	2.6548e-05
		197077500	2.78296e-05	2.73575e-05	2.78298e-05	2.75969e-05	2.7846e-05	2.76961e-05	2.7337e-05	2.69706e-05	2.67384e-05	2.54684e-05	2.78195e-05	2.65244e-05	2.71916e-05
		197080000	2.77595e-05	2.74773e-05	2.76286e-05	2.77655e-05	2.74355e-05	2.80448e-05	2.72717e-05	2.86629e-05	2.70927e-05	2.74127e-05	2.69433e-05	2.64213e-05	2.58769e-05
		197082500	2.74761e-05	2.74783e-05	2.69614e-05	2.765e-05	2.77367e-05	2.68536e-05	2.80709e-05	2.74358e-05	2.51258e-05	2.6269e-05	3.0059e-05	2.79003e-05	2.80832e-05
		197085000	2.76192e-05	2.75046e-05	2.68371e-05	2.73993e-05	2.64219e-05	2.71888e-05	2.65006e-05	2.8645e-05	2.85263e-05	2.79204e-05	2.73003e-05	2.98056e-05	2.53348e-05
		197087500	2.72195e-05	2.70722e-05	2.67325e-05	2.71055e-05	2.73129e-05	2.74603e-05	2.72107e-05	2.70979e-05	2.59716e-05	2.62755e-05	2.68473e-05	2.58992e-05	2.77756e-05
		197090000	2.71695e-05	2.6445e-05	2.63644e-05	2.73742e-05	2.65803e-05	2.71311e-05	2.70123e-05	2.58415e-05	2.7708e-05	2.82483e-05	2.75276e-05	2.73986e-05	2.81624e-05
		197092500	2.66962e-05	2.66232e-05	2.63481e-05	2.67104e-05	2.71785e-05	2.59031e-05	2.61578e-05	2.78176e-05	2.62274e-05	2.61743e-05	2.39796e-05	2.49652e-05	2.73985e-05
		197095000	2.65965e-05	2.62384e-05	2.67236e-05	2.67189e-05	2.62701e-05	2.5854e-05	2.60036e-05	2.68862e-05	2.52995e-05	2.48074e-05	2.86908e-05	2.6233e-05	2.47336e-05
		197097500	2.67326e-05	2.60779e-05	2.6212e-05	2.69585e-05	2.60591e-05	2.71365e-05	2.66677e-05	2.68955e-05	2.69527e-05	2.60901e-05	2.66489e-05	2.67358e-05	2.62914e-05
		197100000	2.6335e-05	2.62487e-05	2.58115e-05	2.67941e-05	2.67392e-05	2.61167e-05	2.61985e-05	2.5013e-05	2.54026e-05	2.78032e-05	2.48865e-05	2.63659e-05	2.20036e-05
		197102500	2.609e-05	2.59464e-05	2.54621e-05	2.59985e-05	2.60572e-05	2.62832e-05	2.54075e-05	2.55012e-05	2.61866e-05	2.83223e-05	2.57627e-05	2.71671e-05	2.40392e-05
		197105000	2.61561e-05	2.54726e-05	2.56699e-05	2.61653e-05	2.57104e-05	2.46994e-05	2.55427e-05	2.46739e-05	2.45685e-05	2.46627e-05	2.64364e-05	2.5596e-05	2.52306e-05
		197107500	2.56743e-05	2.56156e-05	2.52947e-05	2.56834e-05	2.55382e-05	2.56398e-05	2.55511e-05	2.59814e-05	2.28982e-05	2.77576e-05	2.64668e-05	2.63801e-05	3.14332e-05
		197110000	2.53909e-05	2.51071e-05	2.51829e-05	2.50483e-05	2.50534e-05	2.57696e-05	2.47944e-05	2.66665e-05	2.44615e-05	2.7478e-05	2.54442e-05	2.52975e-05	2.39422e-05
		197112500	2.52124e-05	2.50803e-05	2.49633e-05	2.51811e-05	2.41917e-05	2.3974e-05	2.54304e-05	2.50847e-05	2.60044e-05	2.48538e-05	2.59689e-05	2.35665e-05	2.80725e-05
		197115000	2.48839e-05	2.47969e-05	2.46045e-05	2.54992e-05	2.38997e-05	2.49207e-05	2.4465e-05	2.43312e-05	2.4917e-05	2.4861e-05	2.5148e-05	2.19313e-05	2.75829e-05
		197117500	2.4523e-05	2.41328e-05	2.38844e-05	2.43065e-05	2.34317e-05	2.42465e-05	2.39972e-05	2.37306e-05	2.45417e-05	2.3334e-05	2.49275e-05	2.35163e-05	2.09098e-05
		197120000	2.38201e-05	2.36474e-05	2.37705e-05	2.34646e-05	2.34129e-05	2.345e-05	2.41377e-05	2.37784e-05	2.41803e-05	2.09857e-05	2.4555e-05	2.16294e-05	2.5734e-05
		197122500	2.36215e-05	2.32157e-05	2.29158e-05	2.43084e-05	2.32911e-05	2.30194e-05	2.34697e-05	2.35751e-05	2.26206e-05	2.34752e-05	2.1121e-05	2.57479e-05	1.942e-05
		197125000	2.27452e-05	2.25765e-05	2.26597e-05	2.33434e-05	2.25324e-05	2.27742e-05	2.32946e-05	2.27478e-05	2.21174e-05	2.19245e-05	2.09309e-05	1.99032e-05	1.93301e-05
		197127500	2.2392e-05	2.19617e-05	2.1578e-05	2.26266e-05	2.25008e-05	2.15228e-05	2.32123e-05	2.23563e-05	2.03942e-05	2.25859e-05	2.07744e-05	1.88609e-05	2.38531e-05
		197130000	2.15699e-05	2.13694e-05	2.10552e-05	2.1479e-05	2.10537e-05	2.15653e-05	2.14435e-05	1.98199e-05	1.99937e-05	2.13252e-05	2.00568e-05	1.88169e-05	2.18487e-05
		197132500	2.09079e-05	2.07358e-05	2.03604e-05	2.13945e-05	2.03027e-05	2.11779e-05	2.2127e-05	2.05655e-05	2.13539e-05	2.23584e-05	2.09349e-05	1.89598e-05	2.25867e-05
		197135000	2.03025e-05	1.99119e-05	1.97696e-05	2.01706e-05	2.0645e-05	1.97275e-05	2.0425e-05	1.99489e-05	1.9289e-05	2.13057e-05	1.65217e-05	1.8304e-05	1.92238e-05
		197137500	1.9634e-05	1.92104e-05	1.92392e-05	1.97108e-05	1.87677e-05	1.90393e-05	1.9692e-05	1.92012e-05	1.73617e-05	1.73405e-05	1.75842e-05	1.80111e-05	1.86279e-05
		197140000	1.90514e-05	1.8754e-05	1.84087e-05	1.89934e-05	1.85904e-05	1.82989e-05	1.94434e-05	1.89544e-05	1.704e-05	1.79777e-05	1.59989e-05	1.5143e-05	1.93815e-05
		197142500	1.81651e-05	1.79734e-05	1.75716e-05	1.87008e-05	1.83831e-05	1.81393e-05	1.76218e-05	1.69513e-05	1.67398e-05	1.75567e-05	1.59117e-05	1.6453e-05	1.74692e-05
		197145000	1.76283e-05	1.74491e-05	1.72125e-05	1.76131e-05	1.70926e-05	1.74636e-05	1.71599e-05	1.70529e-05	1.68745e-05	1.81742e-05	1.46866e-05	1.52071e-05	1.54961e-05
		197147500	1.67624e-05	1.66285e-05	1.64605e-05	1.69261e-05	1.60606e-05	1.72159e-05	1.64745e-05	1.63913e-05	1.6132e-05	1.53352e-05	1.67849e-05	1.39637e-05	1.71913e-05
		197150000	1.61249e-05	1.59138e-05	1.57692e-05	1.64014e-05	1.5882e-05	1.52963e-05	1.54803e-05	1.48692e-05	1.55228e-05	1.6119e-05	1.49818e-05	1.50912e-05	1.50818e-05
		197152500	1.51553e-05	1.50796e-05	1.4646e-05	1.51828e-05	1.48125e-05	1.47616e-05	1.60149e-05	1.50429e-05	1.42003e-05	1.30854e-05	1.35261e-05	1.44758e-05	9.5711e-06
		197155000	1.45237e-05	1.43045e-05	1.38164e-05	1.45599e-05	1.4381e-05	1.42558e-05	1.42933e-05	1.47836e-05	1.46274e-05	1.33535e-05	1.31217e-05	1.46697e-05	1.25701e-05
		197157500	1.34908e-05	1.31636e-05	1.33801e-05	1.39656e-05	1.35256e-05	1.35197e-05	1.38353e-05	1.3288e-05	1.16123e-05	1.14547e-05	1.33857e-05	1.49166e-05	9.4228e-06
		197160000	1.27305e-05	1.27324e-05	1.21545e-05	1.31555e-05	1.22663e-05	1.22474e-05	1.33059e-05	1.16422e-05	1.2518e-05	1.21725e-05	1.16284e-05	1.25677e-05	1.30041e-05
		197162500	1.19025e-05	1.19598e-05	1.16686e-05	1.22381e-05	1.16584e-05	1.23368e-05	1.19522e-05	1.16593e-05	1.25102e-05	1.19538e-05	9.39291e-06	1.05819e-05	9.39801e-06
		197165000	1.13564e-05	1.09277e-05	1.08458e-05	1.13136e-05	1.10341e-05	1.09635e-05	1.14639e-05	1.0874e-05	1.07096e-05	1.14179e-05	1.13167e-05	1.09491e-05	1.27758e-05
		197167500	1.06366e-05	1.0338e-05	1.02269e-05	1.06673e-05	1.02448e-05	1.03029e-05	1.06647e-05	9.79846e-06	8.73464e-06	1.09861e-05	9.46793e-06	1.12187e-05	1.04027e-05
		197170000	9.80302e-06	9.70696e-06	9.5243e-06	9.96887e-06	9.51722e-06	9.70371e-06	9.30654e-06	9.95217e-06	8.83769e-06	9.82501e-06	8.80057e-06	8.99725e-06	8.85048e-06
		197172500	9.1712e-06	8.94485e-06	8.95181e-06	9.09855e-06	9.13779e-06	8.96927e-06	9.36309e-06	8.73929e-06	8.02829e-06	8.78638e-06	8.01521e-06	7.97423e-06	9.551e-06
		197175000	8.42483e-06	8.22606e-06	8.24216e-06	8.63149e-06	8.15641e-06	7.84552e-06	8.15036e-06	8.17167e-06	8.14989e-06	8.87685e-06	8.18553e-06	8.66497e-06	5.61892e-06
		197177500	7.64622e-06	7.63029e-06	7.62711e-06	8.1073e-06	7.86086e-06	7.79344e-06	7.12846e-06	7.16117e-06	6.9872e-06	6.29998e-06	6.77484e-06	7.96456e-06	7.95529e-06
		197180000	7.07258e-06	6.99724e-06	6.931e-06	7.09196e-06	7.39071e-06	7.00047e-06	6.9386e-06	6.57538e-06	5.4408e-06	6.10669e-06	6.69505e-06	4.53283e-06	6.65575e-06
		197182500	6.48175e-06	6.40304e-06	6.51082e-06	7.03173e-06	6.65885e-06	6.74121e-06	6.67518e-06	6.43006e-06	6.14874e-06	6.33422e-06	5.84716e-06	6.27944e-06	6.05942e-06
		197185000	6.03547e-06	5.84518e-06	5.82575e-06	5.98886e-06	5.56959e-06	5.65934e-06	6.14268e-06	5.84007e-06	5.93084e-06	6.25235e-06	5.55536e-06	5.07546e-06	6.27788e-06
		197187500	5.26011e-06	5.12826e-06	5.2179e-06	5.79181e-06	5.3391e-06	5.75033e-06	5.40286e-06	5.15174e-06	4.94089e-06	5.96406e-06	5.82067e-06	3.09294e-06	6.88067e-06
		197190000	4.68632e-06	4.74844e-06	4.8025e-06	4.89236e-06	4.63666e-06	4.67788e-06	4.88656e-06	4.93775e-06	4.75421e-06	4.36288e-06	4.27903e-06	3.33037e-06	5.70561e-06
		197192500	4.31183e-06	4.17983e-06	4.03344e-06	4.56639e-06	3.92181e-06	4.13076e-06	4.33512e-06	4.07982e-06	3.63652e-06	5.44071e-06	3.46738e-06	2.95302e-06	3.94641e-06
		197195000	3.80864e-06	3.58594e-06	3.58499e-06	3.92278e-06	3.92306e-06	3.9704e-06	3.56844e-06	3.44194e-06	4.31367e-06	3.13431e-06	2.6078e-06	3.99852e-06	3.52093e-06
		197197500	3.26383e-06	3.24382e-06	3.0236e-06	3.401e-06	3.14723e-06	3.34029e-06	3.31976e-06	3.30004e-06	3.2473e-06	3.31256e-06	1.81958e-06	2.05135e-06	4.7934e-06
		197200000	2.89904e-06	2.77047e-06	2.76559e-06	3.02269e-06	2.73604e-06	3.11395e-06	2.85328e-06	2.51413e-06	3.00608e-06	3.91611e-06	2.39531e-06	1.91856e-06	2.5719e-06
		197202500	2.40608e-06	2.34958e-06	2.3985e-06	2.55142e-06	2.30529e-06	2.41661e-06	2.14215e-06	2.40854e-06	2.55627e-06	2.2592e-06	3.52967e-06	2.04846e-06	2.94135e-06
		197205000	2.04221e-06	2.08747e-06	2.01982e-06	2.30978e-06	2.20639e-06	2.34078e-06	2.26009e-06	1.93788e-06	2.27414e-06	1.98445e-06	1.94552e-06	8.37996e-07	3.23353e-06
		197207500	1.78386e-06	1.69417e-06	1.76143e-06	1.94375e-06	1.62774e-06	1.83155e-06	1.70634e-06	1.84654e-06	1.45932e-06	1.89832e-06	1.53449e-06	1.5955e-06	1.82835e-06
		197210000	1.49132e-06	1.46192e-06	1.49908e-06	1.58813e-06	1.50112e-06	1.37608e-06	1.36846e-06	1.44146e-06	1.81788e-06	1.3781e-06	9.86339e-07	1.40906e-06	8.4886e-07
		197212500	1.27344e-06	1.12744e-06	1.24587e-06	1.35146e-06	1.17475e-06	1.20866e-06	1.29653e-06	1.2761e-06	8.30503e-07	9.57273e-07	8.7494e-07	5.91198e-07	1.41336e-06
		197215000	1.03577e-06	1.01394e-06	1.01102e-06	1.20769e-06	9.62789e-07	1.1218e-06	1.1492e-06	1.04807e-06	1.09998e-06	9.42799e-07	1.02627e-06	1.27304e-06	6.85327e-07
		197217500	9.02664e-07	8.07823e-07	8.81373e-07	9.80203e-07	9.28475e-07	8.65749e-07	1.11462e-06	6.57549e-07	7.98614e-07	6.11041e-07	7.0204e-07	7.18265e-07	2.5094e-06
		197220000	7.60029e-07	6.77035e-07	6.97212e-07	8.05002e-07	7.22272e-07	7.69923e-07	5.98837e-07	9.57218e-07	5.14308e-07	6.43551e-07	5.16978e-07	7.6439e-07	3.37343e-07
		197222500	5.95807e-07	5.51317e-07	6.02658e-07	6.66399e-07	6.74289e-07	6.93044e-07	6.95668e-07	4.8797e-07	4.87172e-07	1.00313e-06	2.41766e-07	4.94448e-07	1.0237e-06
		197225000	5.26596e-07	4.66336e-07	4.89678e-07	5.91401e-07	4.49819e-07	5.10728e-07	5.52249e-07	5.19163e-07	3.46312e-07	4.15201e-07	4.40414e-07	2.82526e-07	8.08398e-07
		197227500	4.93251e-07	4.59103e-07	4.40366e-07	5.34742e-07	3.76845e-07	3.26078e-07	4.89355e-07	2.36145e-07	2.36125e-07	2.45698e-07	4.32835e-07	2.75297e-07	5.03131e-07
		197230000	4.34024e-07	4.33342e-07	4.47978e-07	4.70872e-07	4.4799e-07	4.46818e-07	4.27566e-07	4.49274e-07	4.6147e-07	2.26939e-07	1.49219e-07	1.4399e-07	3.74554e-07
		197232500	4.69531e-07	4.35759e-07	4.41475e-07	4.69347e-07	4.34374e-07	4.0918e-07	3.68656e-07	6.10252e-07	4.07505e-07	7.28154e-07	4.25091e-07	1.05034e-06	1.32774e-06
		197235000	5.35919e-07	4.87464e-07	4.63325e-07	5.35732e-07	4.85596e-07	6.00608e-07	5.57644e-07	6.32795e-07	2.8003e-07	3.44684e-07	3.75947e-07	1.39745e-06	5.08046e-07
		197237500	6.55713e-07	6.29698e-07	6.63098e-07	6.26148e-07	6.49793e-07	6.64323e-07	7.40769e-07	5.62148e-07	9.35966e-07	9.02626e-07	1.13011e-06	6.20962e-07	3.11905e-07
		197240000	8.54468e-07	8.19506e-07	8.19128e-07	8.26333e-07	6.75783e-07	7.04987e-07	7.96344e-07	8.99382e-07	8.26929e-07	7.54494e-07	5.68637e-07	1.24656e-06	1.09483e-06
		197242500	1.10766e-06	1.02625e-06	1.0543e-06	1.11162e-06	1.12494e-06	9.79055e-07	1.00983e-06	1.10305e-06	1.04742e-06	9.54663e-07	9.85467e-07	1.59889e-06	1.42258e-06
		197245000	1.41271e-06	1.37656e-06	1.39681e-06	1.31732e-06	1.42013e-06	1.39328e-06	1.40451e-06	1.53117e-06	1.91755e-06	1.37253e-06	1.79195e-06	1.31482e-06	1.88724e-06
		197247500	1.85574e-06	1.80551e-06	1.82832e-06	1.72391e-06	1.97185e-06	1.86221e-06	1.64488e-06	2.31025e-06	2.07027e-06	2.19949e-06	2.58482e-06	3.27471e-06	3.03643e-06
		197250000	2.41827e-06	2.1928e-06	2.35313e-06	2.10648e-06	2.32435e-06	2.08669e-06	1.93319e-06	2.51442e-06	2.84683e-06	2.71849e-06	2.75387e-06	2.29758e-06	3.16456e-06
		197252500	3.03669e-06	2.87179e-06	2.89348e-06	2.58578e-06	2.80419e-06	2.76576e-06	2.88845e-06	2.83672e-06	3.1835e-06	3.13091e-06	3.49816e-06	3.05703e-06	3.39021e-06
		197255000	3.49123e-06	3.56995e-06	3.4805e-06	3.48102e-06	3.4225e-06	3.51471e-06	3.2384e-06	4.09476e-06	3.08229e-06	3.97966e-06	5.26032e-06	3.03218e-06	5.63791e-06
		197257500	4.22189e-06	4.15469e-06	4.13823e-06	4.34121e-06	3.92961e-06	4.09812e-06	4.09444e-06	4.58988e-06	4.73858e-06	4.2779e-06	3.9939e-06	6.07329e-06	5.39291e-06
		197260000	5.19629e-06	5.00925e-06	5.03191e-06	5.02738e-06	5.26233e-06	5.11268e-06	5.46516e-06	4.93327e-06	5.01817e-06	6.5618e-06	5.07455e-06	6.0447e-06	6.459e-06
		197262500	5.8442e-06	5.85081e-06	5.74255e-06	5.74606e-06	5.8627e-06	5.65977e-06	5.65863e-06	6.10478e-06	6.55048e-06	5.98257e-06	7.73747e-06	6.93657e-06	7.71463e-06
		197265000	6.54989e-06	6.6611e-06	6.7021e-06	6.35546e-06	6.71027e-06	6.90396e-06	6.67447e-06	6.53081e-06	7.74273e-06	6.7646e-06	7.68019e-06	6.23682e-06	7.94253e-06
		197267500	7.5212e-06	7.32448e-06	7.55438e-06	7.26877e-06	7.32049e-06	7.61144e-06	7.55007e-06	7.91148e-06	8.30239e-06	8.42733e-06	7.27927e-06	9.11345e-06	1.26724e-05
		197270000	8.54585e-06	8.29423e-06	8.26441e-06	8.44701e-06	8.5931e-06	8.34665e-06	8.21244e-06	8.86799e-06	8.79966e-06	9.35647e-06	8.57824e-06	8.92072e-06	9.52272e-06
		197272500	9.19134e-06	9.2262e-06	9.33394e-06	8.95278e-06	9.13467e-06	9.20859e-06	9.91062e-06	9.11998e-06	1.00758e-05	9.69221e-06	9.52162e-06	1.0591e-05	9.61692e-06
		197275000	9.97036e-06	9.80794e-06	9.82481e-06	9.57472e-06	9.6301e-06	9.83495e-06	1.00239e-05	1.04898e-05	1.08454e-05	1.13711e-05	9.54861e-06	1.30834e-05	9.01112e-06
		197277500	1.08978e-05	1.09875e-05	1.06893e-05	1.06572e-05	1.04597e-05	1.10309e-05	1.10964e-05	1.13756e-05	1.12876e-05	1.10928e-05	9.61389e-06	1.2674e-05	1.3707e-05
		197280000	1.17133e-05	1.19918e-05	1.16203e-05	1.16796e-05	1.15781e-05	1.1625e-05	1.15202e-05	1.2786e-05	1.26955e-05	1.44829e-05	1.31406e-05	1.37918e-05	1.55966e-05
		197282500	1.24707e-05	1.26023e-05	1.26006e-05	1.23242e-05	1.28915e-05	1.25503e-05	1.17811e-05	1.24771e-05	1.25156e-05	1.30627e-05	1.22745e-05	1.34616e-05	1.23043e-05
		197285000	1.33187e-05	1.32415e-05	1.31455e-05	1.35213e-05	1.27054e-05	1.28861e-05	1.23539e-05	1.30746e-05	1.37049e-05	1.43777e-05	1.3599e-05	1.71608e-05	1.42884e-05
		197287500	1.42145e-05	1.38925e-05	1.42233e-05	1.3936e-05	1.42114e-05	1.42235e-05	1.47673e-05	1.50506e-05	1.50048e-05	1.49364e-05	1.65029e-05	1.38706e-05	1.63601e-05
		197290000	1.49862e-05	1.48234e-05	1.47379e-05	1.46598e-05	1.4722e-05	1.47006e-05	1.42692e-05	1.56794e-05	1.49217e-05	1.51131e-05	1.44243e-05	1.68576e-05	1.38161e-05
		197292500	1.57045e-05	1.54536e-05	1.50698e-05	1.576e-05	1.60161e-05	1.61028e-05	1.52093e-05	1.53452e-05	1.61684e-05	1.64813e-05	1.7457e-05	1.71682e-05	1.48409e-05
		197295000	1.63332e-05	1.62978e-05	1.60721e-05	1.63301e-05	1.66162e-05	1.61332e-05	1.64452e-05	1.71229e-05	1.60507e-05	1.77946e-05	1.55638e-05	1.62743e-05	1.59536e-05
		197297500	1.70176e-05	1.70457e-05	1.68561e-05	1.73122e-05	1.73428e-05	1.67836e-05	1.69747e-05	1.65438e-05	1.64499e-05	1.67679e-05	1.90289e-05	1.83897e-05	1.92088e-05
		197300000	1.78738e-05	1.75114e-05	1.78821e-05	1.84572e-05	1.7924e-05	1.79792e-05	1.80487e-05	1.8445e-05	1.85868e-05	1.93132e-05	1.69312e-05	2.17236e-05	1.92952e-05
		197302500	1.87152e-05	1.8599e-05	1.86356e-05	1.86012e-05	1.85674e-05	1.83068e-05	1.9143e-05	1.93742e-05	1.98502e-05	1.8457e-05	1.79659e-05	2.13968e-05	1.80375e-05
		197305000	1.96046e-05	1.91318e-05	1.89503e-05	1.97294e-05	1.92372e-05	1.94948e-05	1.94501e-05	2.01416e-05	1.91876e-05	2.01357e-05	2.01185e-05	1.98083e-05	1.784e-05
		197307500	2.02917e-05	2.03083e-05	2.02448e-05	2.04219e-05	2.00742e-05	1.99607e-05	2.05886e-05	2.00169e-05	2.04147e-05	2.23083e-05	1.83221e-05	2.20483e-05	2.38335e-05
		197310000	2.0776e-05	2.09106e-05	2.07806e-05	2.08871e-05	2.03253e-05	2.01686e-05	2.12004e-05	2.0765e-05	2.30733e-05	2.16471e-05	2.07106e-05	2.12329e-05	2.29669e-05
		197312500	2.15985e-05	2.18629e-05	2.16355e-05	2.24367e-05	2.1465e-05	2.17327e-05	2.11509e-05	2.25443e-05	2.10886e-05	2.19485e-05	2.64357e-05	2.36362e-05	2.18298e-05
		197315000	2.27568e-05	2.25712e-05	2.251e-05	2.30268e-05	2.19115e-05	2.24682e-05	2.33424e-05	2.22531e-05	2.22274e-05	2.4824e-05	2.22783e-05	2.3846e-05	2.58133e-05
		197317500	2.36254e-05	2.34939e-05	2.37562e-05	2.37394e-05	2.37721e-05	2.37695e-05	2.35429e-05	2.35115e-05	2.35758e-05	2.38862e-05	2.63212e-05	2.28347e-05	2.08627e-05
		197320000	2.45165e-05	2.46929e-05	2.40674e-05	2.45573e-05	2.47728e-05	2.4021e-05	2.39638e-05	2.54157e-05	2.39822e-05	2.57412e-05	2.64204e-05	2.78851e-05	2.35046e-05
		197322500	2.54155e-05	2.54348e-05	2.55382e-05	2.58846e-05	2.54038e-05	2.45894e-05	2.53015e-05	2.67601e-05	2.56859e-05	2.33329e-05	2.54643e-05	2.51715e-05	2.90802e-05
		197325000	2.67432e-05	2.61831e-05	2.58562e-05	2.64851e-05	2.64296e-05	2.54429e-05	2.63644e-05	2.64022e-05	2.83024e-05	2.62861e-05	2.98694e-05	2.68004e-05	2.80784e-05
		197327500	2.74472e-05	2.74111e-05	2.72571e-05	2.75404e-05	2.70227e-05	2.69663e-05	2.70446e-05	2.86927e-05	2.77118e-05	2.74593e-05	2.90753e-05	2.55744e-05	3.13304e-05
		197330000	2.82966e-05	2.82606e-05	2.81215e-05	2.87234e-05	2.82134e-05	2.83838e-05	2.79301e-05	2.81762e-05	2.88812e-05	2.74971e-05	2.88766e-05	3.01953e-05	2.99559e-05
		197332500	2.96345e-05	2.91644e-05	2.91031e-05	2.90849e-05	2.89326e-05	2.97815e-05	2.88223e-05	2.9953e-05	3.08862e-05	2.80788e-05	2.96203e-05	3.12568e-05	3.30106e-05
		197335000	3.04299e-05	3.00864e-05	2.98275e-05	3.10338e-05	2.98554e-05	3.03844e-05	2.93063e-05	2.99874e-05	2.94092e-05	3.1538e-05	2.8624e-05	2.97721e-05	3.1846e-05
		197337500	3.07518e-05	3.0841e-05	3.07344e-05	3.14427e-05	3.01799e-05	3.08834e-05	3.11316e-05	3.18651e-05	3.01448e-05	3.02584e-05	3.16777e-05	3.31222e-05	3.41537e-05
		197340000	3.17393e-05	3.19839e-05	3.16017e-05	3.21445e-05	3.1974e-05	3.18037e-05	3.12948e-05	3.17747e-05	3.31593e-05	3.13703e-05	3.25408e-05	3.32394e-05	2.90101e-05
		197342500	3.24141e-05	3.26284e-05	3.1706e-05	3.27657e-05	3.18876e-05	3.21886e-05	3.28746e-05	3.25606e-05	3.24404e-05	3.2195e-05	3.19124e-05	3.19605e-05	3.32701e-05
		197345000	3.29171e-05	3.31465e-05	3.25052e-05	3.29932e-05	3.39695e-05	3.2327e-05	3.20128e-05	3.19499e-05	3.5762e-05	3.31804e-05	3.17892e-05	3.51984e-05	3.20033e-05
		197347500	3.32666e-05	3.27258e-05	3.35455e-05	3.37744e-05	3.23321e-05	3.24147e-05	3.32716e-05	3.33844e-05	3.23773e-05	3.14908e-05	3.50498e-05	3.32368e-05	3.70907e-05
		197350000	3.35948e-05	3.37093e-05	3.29736e-05	3.41228e-05	3.34185e-05	3.34979e-05	3.39213e-05	3.30765e-05	3.34127e-05	3.44549e-05	3.54298e-05	3.36564e-05	3.27449e-05
		197352500	3.35986e-05	3.36451e-05	3.2903e-05	3.43064e-05	3.42139e-05	3.42408e-05	3.29009e-05	3.33336e-05	3.32221e-05	3.15924e-05	3.4182e-05	3.27989e-05	3.41124e-05
		197355000	3.37958e-05	3.35461e-05	3.35259e-05	3.34847e-05	3.33511e-05	3.29375e-05	3.35097e-05	3.35244e-05	3.14849e-05	3.50467e-05	3.40156e-05	3.2666e-05	3.53866e-05
		197357500	3.38321e-05	3.34101e-05	3.31394e-05	3.4779e-05	3.40212e-05	3.28401e-05	3.43215e-05	3.36836e-05	3.15271e-05	3.06853e-05	3.49749e-05	3.46826e-05	3.46964e-05
		197360000	3.3364e-05	3.32117e-05	3.35946e-05	3.30628e-05	3.27396e-05	3.27549e-05	3.34801e-05	3.41952e-05	3.44318e-05	3.36974e-05	3.1679e-05	2.99477e-05	3.00449e-05
		197362500	3.30729e-05	3.32964e-05	3.25013e-05	3.35197e-05	3.32243e-05	3.28079e-05	3.28947e-05	3.18933e-05	3.16532e-05	3.2072e-05	3.33934e-05	3.25066e-05	2.96635e-05
		197365000	3.27462e-05	3.24729e-05	3.23758e-05	3.32807e-05	3.25158e-05	3.21726e-05	3.22863e-05	3.28777e-05	3.01536e-05	3.15914e-05	3.02772e-05	3.17908e-05	2.93539e-05
		197367500	3.18287e-05	3.25383e-05	3.26027e-05	3.288e-05	3.14587e-05	3.28268e-05	3.27135e-05	3.16488e-05	3.02949e-05	3.25582e-05	3.0703e-05	2.62516e-05	3.42923e-05
		197370000	3.2078e-05	3.15885e-05	3.13544e-05	3.23088e-05	3.11575e-05	3.21908e-05	3.16824e-05	3.26519e-05	3.04766e-05	3.16892e-05	2.87585e-05	3.15682e-05	2.90772e-05
		197372500	3.13469e-05	3.10316e-05	3.14313e-05	3.21877e-05	3.20597e-05	3.10236e-05	3.07136e-05	3.08301e-05	3.19887e-05	2.8296e-05	3.112e-05	2.93758e-05	2.9729e-05
		197375000	3.08746e-05	3.08448e-05	3.05425e-05	3.15389e-05	3.14032e-05	3.17897e-05	3.04348e-05	2.98915e-05	3.12764e-05	3.03727e-05	3.17276e-05	2.48581e-05	2.37306e-05
		197377500	3.04316e-05	3.04811e-05	3.03004e-05	3.07854e-05	2.99686e-05	2.99602e-05	3.03034e-05	2.90548e-05	3.0003e-05	2.99295e-05	3.07967e-05	2.93646e-05	2.81327e-05
		197380000	2.96905e-05	2.91655e-05	2.93726e-05	3.0271e-05	2.98879e-05	2.94517e-05	2.99082e-05	3.00245e-05	2.83092e-05	2.9773e-05	2.57675e-05	2.9866e-05	2.95816e-05
		197382500	2.93164e-05	2.87458e-05	2.87177e-05	2.94772e-05	2.91426e-05	2.93426e-05	2.89258e-05	2.70833e-05	2.78285e-05	2.56319e-05	2.73993e-05	2.87826e-05	2.51986e-05
		197385000	2.8802e-05	2.83685e-05	2.83452e-05	2.92483e-05	2.82245e-05	2.78292e-05	2.82238e-05	2.89867e-05	2.72931e-05	2.73566e-05	2.44936e-05	2.72776e-05	2.94038e-05
		197387500	2.80652e-05	2.77122e-05	2.77438e-05	2.86319e-05	2.85217e-05	2.79051e-05	2.68685e-05	2.79317e-05	2.79588e-05	2.66239e-05	2.41205e-05	2.49647e-05	2.87888e-05
		197390000	2.73936e-05	2.70179e-05	2.68196e-05	2.79079e-05	2.71791e-05	2.72418e-05	2.78342e-05	2.66557e-05	2.71678e-05	2.65359e-05	2.60193e-05	2.69516e-05	2.74287e-05
		197392500	2.65352e-05	2.65369e-05	2.59408e-05	2.74251e-05	2.65929e-05	2.6798e-05	2.68968e-05	2.67265e-05	2.48052e-05	2.59059e-05	2.44944e-05	2.60939e-05	2.28661e-05
		197395000	2.59406e-05	2.58865e-05	2.57595e-05	2.61898e-05	2.55813e-05	2.68201e-05	2.56566e-05	2.45893e-05	2.42548e-05	2.46134e-05	2.46343e-05	2.57258e-05	2.35321e-05
		197397500	2.55145e-05	2.55217e-05	2.51009e-05	2.56055e-05	2.57031e-05	2.47798e-05	2.43614e-05	2.50721e-05	2.36427e-05	2.37387e-05	2.52476e-05	2.37973e-05	2.44138e-05
		197400000	2.50214e-05	2.50536e-05	2.5215e-05	2.5624e-05	2.52025e-05	2.44659e-05	2.33273e-05	2.42691e-05	2.41614e-05	2.44468e-05	2.15674e-05	2.22055e-05	2.46573e-05
		197402500	2.44597e-05	2.4213e-05	2.40312e-05	2.50532e-05	2.37921e-05	2.50616e-05	2.4902e-05	2.40075e-05	2.37644e-05	2.39967e-05	2.06784e-05	2.45707e-05	2.38052e-05
		197405000	2.38611e-05	2.38542e-05	2.38498e-05	2.46586e-05	2.41489e-05	2.43922e-05	2.36532e-05	2.29395e-05	2.25578e-05	2.17348e-05	2.25261e-05	2.45859e-05	2.22652e-05
		197407500	2.38291e-05	2.36971e-05	2.3375e-05	2.42913e-05	2.38478e-05	2.38796e-05	2.33689e-05	2.31011e-05	2.31806e-05	2.21737e-05	2.4289e-05	2.2783e-05	2.31637e-05
		197410000	2.31669e-05	2.31136e-05	2.2677e-05	2.35028e-05	2.28116e-05	2.33512e-05	2.32944e-05	2.23196e-05	2.30159e-05	2.26032e-05	2.30512e-05	2.09862e-05	2.13196e-05
		197412500	2.28265e-05	2.27131e-05	2.25822e-05	2.32779e-05	2.31102e-05	2.29605e-05	2.2639e-05	2.21554e-05	2.16507e-05	2.07495e-05	2.04766e-05	2.14787e-05	2.30532e-05
		197415000	2.24054e-05	2.23913e-05	2.27427e-05	2.27554e-05	2.22522e-05	2.2682e-05	2.20841e-05	2.26751e-05	2.20785e-05	2.22715e-05	2.09406e-05	2.13103e-05	2.46822e-05
		197417500	2.21828e-05	2.20396e-05	2.1758e-05	2.27843e-05	2.15872e-05	2.29879e-05	2.12925e-05	2.29083e-05	2.26468e-05	2.20414e-05	1.80862e-05	2.26406e-05	2.00906e-05
		197420000	2.15735e-05	2.1876e-05	2.16751e-05	2.19919e-05	2.17504e-05	2.20457e-05	2.21126e-05	2.15515e-05	2.20913e-05	2.14286e-05	2.06422e-05	2.02831e-05	1.86303e-05
		197422500	2.10051e-05	2.11827e-05	2.11089e-05	2.16781e-05	2.07061e-05	2.11498e-05	2.02542e-05	1.99354e-05	2.07198e-05	1.86839e-05	2.0777e-05	2.08752e-05	1.74239e-05
		197425000	2.07102e-05	2.06242e-05	2.03849e-05	2.09828e-05	2.05595e-05	2.07346e-05	2.14622e-05	2.08012e-05	1.79896e-05	2.00411e-05	1.97036e-05	2.05621e-05	2.27835e-05
		197427500	1.98627e-05	2.01922e-05	1.97175e-05	2.06198e-05	2.03483e-05	2.05901e-05	1.96662e-05	1.95182e-05	2.00233e-05	1.90545e-05	1.88813e-05	1.72762e-05	1.57295e-05
		197430000	1.95452e-05	1.93281e-05	1.94731e-05	2.03687e-05	1.98412e-05	1.96067e-05	1.98495e-05	1.79018e-05	2.04921e-05	1.95602e-05	1.99791e-05	1.71873e-05	2.34036e-05
		197432500	1.884e-05	1.89324e-05	1.86684e-05	1.91755e-05	1.84593e-05	1.84471e-05	1.85586e-05	1.90234e-05	1.93686e-05	1.78196e-05	2.13315e-05	1.70284e-05	1.92634e-05
		197435000	1.82321e-05	1.8216e-05	1.82161e-05	1.88489e-05	1.80947e-05	1.782e-05	1.82043e-05	1.73839e-05	1.74305e-05	1.73828e-05	1.71178e-05	1.67773e-05	1.86053e-05
		197437500	1.7732e-05	1.75139e-05	1.75764e-05	1.80434e-05	1.70453e-05	1.76951e-05	1.72193e-05	1.67266e-05	1.70588e-05	1.61915e-05	1.80801e-05	1.65012e-05	1.59192e-05
		197440000	1.67382e-05	1.66649e-05	1.68305e-05	1.71554e-05	1.64343e-05	1.67138e-05	1.63582e-05	1.59853e-05	1.64881e-05	1.65065e-05	1.51909e-05	1.60723e-05	1.85339e-05
		197442500	1.62923e-05	1.61833e-05	1.59027e-05	1.65918e-05	1.65707e-05	1.52701e-05	1.60716e-05	1.57692e-05	1.55275e-05	1.53947e-05	1.39386e-05	1.63664e-05	1.729e-05
		197445000	1.58174e-05	1.55928e-05	1.52373e-05	1.6036e-05	1.51593e-05	1.60368e-05	1.53716e-05	1.52922e-05	1.60046e-05	1.62242e-05	1.49393e-05	1.41527e-05	1.49151e-05
		197447500	1.50157e-05	1.50955e-05	1.49041e-05	1.53182e-05	1.43818e-05	1.44635e-05	1.4586e-05	1.40902e-05	1.3601e-05	1.48725e-05	1.46024e-05	1.42673e-05	1.38536e-05
		197450000	1.43903e-05	1.42708e-05	1.39263e-05	1.48497e-05	1.42831e-05	1.43192e-05	1.39855e-05	1.45217e-05	1.38631e-05	1.36727e-05	1.59588e-05	1.47196e-05	1.38233e-05
		197452500	1.35738e-05	1.36498e-05	1.33169e-05	1.3875e-05	1.36437e-05	1.38083e-05	1.40636e-05	1.40584e-05	1.27361e-05	1.18573e-05	1.24247e-05	1.41233e-05	1.35451e-05
		197455000	1.29433e-05	1.31874e-05	1.30289e-05	1.37808e-05	1.30277e-05	1.32508e-05	1.31488e-05	1.37945e-05	1.1653e-05	1.25222e-05	1.25918e-05	1.30987e-05	9.16615e-06
		197457500	1.25569e-05	1.27163e-05	1.25342e-05	1.33404e-05	1.28039e-05	1.32333e-05	1.25459e-05	1.29388e-05	1.26621e-05	1.26294e-05	1.22334e-05	1.13114e-05	1.20278e-05
		197460000	1.18834e-05	1.20619e-05	1.15068e-05	1.25977e-05	1.22132e-05	1.20714e-05	1.24833e-05	1.16733e-05	1.07313e-05	1.27845e-05	1.04594e-05	1.09404e-05	9.74675e-06
		197462500	1.14035e-05	1.12786e-05	1.14241e-05	1.16604e-05	1.14753e-05	1.20504e-05	1.10811e-05	1.12476e-05	1.00363e-05	1.15424e-05	1.05074e-05	9.92631e-06	9.62591e-06
		197465000	1.09814e-05	1.08023e-05	1.08658e-05	1.13464e-05	1.11273e-05	1.09268e-05	1.14271e-05	1.08651e-05	9.54606e-06	1.01918e-05	9.55111e-06	9.66885e-06	9.09032e-06
		197467500	1.07076e-05	1.04005e-05	1.01994e-05	1.09689e-05	1.00193e-05	1.0301e-05	1.04775e-05	1.06588e-05	1.06918e-05	9.70901e-06	9.26134e-06	8.86047e-06	1.17966e-05
		197470000	1.00896e-05	1.00209e-05	9.868e-06	1.0439e-05	1.03668e-05	1.02576e-05	1.02243e-05	1.0669e-05	8.86603e-06	1.01258e-05	8.92933e-06	9.22372e-06	8.16827e-06
		197472500	9.79152e-06	9.4926e-06	9.56216e-06	9.99441e-06	9.43014e-06	9.59105e-06	9.35834e-06	9.71031e-06	8.26773e-06	9.59058e-06	8.5298e-06	7.31127e-06	1.03407e-05
		197475000	9.21815e-06	9.20371e-06	9.117e-06	9.68717e-06	9.40314e-06	9.33512e-06	9.7415e-06	8.82555e-06	9.04418e-06	8.72515e-06	9.44102e-06	8.62407e-06	9.84131e-06
		197477500	8.93264e-06	8.76363e-06	8.83869e-06	8.80489e-06	8.72853e-06	8.61232e-06	8.48213e-06	9.64868e-06	9.0873e-06	8.39334e-06	7.61462e-06	7.43969e-06	8.23036e-06
		197480000	8.63581e-06	8.24546e-06	8.27603e-06	8.77162e-06	8.81676e-06	8.46268e-06	8.74031e-06	8.90406e-06	8.04355e-06	7.6207e-06	7.72467e-06	7.49233e-06	9.15417e-06
		197482500	8.32415e-06	8.18448e-06	8.07979e-06	8.80465e-06	8.32584e-06	8.42715e-06	7.94969e-06	7.56063e-06	7.42831e-06	7.66179e-06	7.72412e-06	5.98923e-06	5.14078e-06
		197485000	7.92195e-06	7.73101e-06	7.94306e-06	7.70336e-06	7.58571e-06	8.05601e-06	7.65246e-06	7.43603e-06	8.34861e-06	6.67292e-06	8.29851e-06	9.11899e-06	7.86093e-06
		197487500	7.4644e-06	7.60064e-06	7.37318e-06	7.84961e-06	7.67126e-06	7.82932e-06	8.09038e-06	7.41193e-06	7.4855e-06	7.00097e-06	8.01001e-06	6.08726e-06	8.15895e-06
		197490000	7.13408e-06	7.24733e-06	7.08809e-06	7.50361e-06	7.54684e-06	7.04367e-06	7.7244e-06	6.53848e-06	7.37277e-06	8.12185e-06	8.11129e-06	8.24223e-06	5.31249e-06
		197492500	7.0081e-06	7.09857e-06	6.99626e-06	6.97066e-06	6.87942e-06	6.99433e-06	7.24233e-06	6.81075e-06	6.80045e-06	6.31511e-06	7.83092e-06	6.5845e-06	6.09704e-06
		197495000	6.67145e-06	6.52861e-06	6.67524e-06	7.05864e-06	6.6928e-06	6.70309e-06	7.01106e-06	6.68458e-06	6.58646e-06	6.46199e-06	5.66725e-06	6.1455e-06	7.57712e-06
		197497500	6.36562e-06	6.38303e-06	6.2683e-06	6.67676e-06	6.75224e-06	6.18117e-06	6.71344e-06	6.20435e-06	6.50509e-06	6.18761e-06	6.14529e-06	4.30233e-06	5.82574e-06
		197500000	6.21458e-06	6.08768e-06	5.91076e-06	6.22908e-06	6.24797e-06	6.21591e-06	6.18592e-06	6.15525e-06	5.44509e-06	5.35787e-06	5.40357e-06	4.99445e-06	8.16112e-06

## Sheet: Sheet4
Figure 2e
		Input power	Linewidth
		dB	kHz
		12	122.182
		10	120.464
		8	117.994
		6	115.656
		4	114.165
		2	111.743
		0	108.518
		-2	104.453
		-4	100.815
		-6	100.079
		-8	97.057
		-10	91.6048
		-12	87.114
		-14	82.2566
		-16	73.1703
		-18	62.9868
		-20	55.8716
		-22	45.1452
		-24	38.6265
		-26	38.3185
		-28	37.6222
		-30	37.1755
		-32	36.8167
